# Supplementary material
Source: PubMed Central journal article supplement (PMC9350850)

## Supplementary Online Content

Jorgensen A, Baago IB, Rygner Z, et al. Association of oxidative stress–induced nucleic acid damage with psychiatric disorders in adults: a systematic review and meta-analysis. *JAMA Psychiatry*. Published online August 3, 2022. doi:10.1001/jamapsychiatry.2022.2066

**eAppendix.** Search Strategy, Data Extraction, and Covariates

**eReferences**

**eTable 1.** Illness Severity

**eFigure 1.** PRISMA Flow Diagram of the Literature Search and Study Selection

**eTable 2.** Characteristics of Included Cross-sectional Studies

**eTable 3.** Characteristics of Included Intervention Studies

**eFigure 2.** Forest Plots and Meta-analyses of Central Nervous System Markers

**eTable 4.** Multilevel Meta-analyses and Sensitivity Analysis for Central Nervous System Markers

**eTable 5.** Meta-regression Analyses of Covariates

**eTable 6.** Meta-analyses of Secondary Outcomes

**eFigure 3.** Funnel Plot of All Included Cross-sectional Studies

This supplementary material has been provided by the authors to give readers additional information about their work.

## **eAppendix.** Search Strategy, Data Extraction, and Covariates

### *Search strategy*

#### **PubMed and MEDLINE**

*Last search day: November 16, 2021*

Search terms: (Deoxyribonucleic acid OR Ribonucleic acid OR DNA OR RNA OR nucleic acid)

AND

(oxidative OR oxidation OR oxidatively OR free radical OR reactive oxygen species OR ROS OR 8-oxo-7,8-dihydro-2-deoxyguanosine OR 8-oxo-7,8-dihydroguanosine OR 8OhdG OR 8-OhdG OR 8oxodG OR 8-oxodG OR 8OHG OR 8-OHG OR 8oxoGuo OR 8-oxoGUO)

AND

(mental disorders [Mesh] OR psychiatry [Mesh] OR depressive disorder [Mesh] OR anxiety disorders [Mesh] OR bipolar disorder [Mesh] OR stress, psychological [Mesh] OR obsessive-compulsive disorder [Mesh] OR schizophrenia [Mesh] OR psychotic disorders [Mesh] OR personality disorders [Mesh])

No limitations were made.

#### **PsycINFO and EMBASE**

*Last search day: November 16, 2021*

Search terms: (Deoxyribonucleic acid OR Ribonucleic acid OR DNA OR RNA OR nucleic acid)

AND

(oxidative OR oxidation OR oxidatively OR free radical OR reactive oxygen species OR ROS OR 8-oxo-7,8-dihydro-2-deoxyguanosine OR 8-oxo-7,8-dihydroguanosine OR 8OhdG OR 8-OhdG OR 8oxodG OR 8-oxodG OR 8OHG OR 8-OHG OR 8oxoGuo OR 8-oxoGUO)

AND

(mental disorders OR psychiatry OR depressive disorder OR anxiety disorders OR bipolar disorder OR stress, psychological OR obsessive-compulsive disorder OR schizophrenia OR psychotic disorders OR personality disorders)

No limitations were made.

### *Data extraction*

Two authors (IBB and AJ) screened the articles for relevance by title and abstract. The selected articles were read in detail and assessed for eligibility following the inclusion criteria by two senior authors (HEP and AJ). In case of disagreement, a consensus decision was made. A specific data extraction sheet was made for the study. The data extraction sheet was pilot tested on ten studies and subsequently refined. Data extraction was made by two authors independently (IBB+ZR) to eliminate errors and ensure validity. In case of disagreement, a senior co-author was consulted (HEP or AJ).

In the case of missing data regarding the main outcome measures, authors were contacted (twice if necessary) with a data request. If the authors did not respond or were unable to provide the data, but data were presented in a graph, we extracted numerical values from the graphs using an online tool (<https://plotdigitizer.com/app>). In all continuous variables, the preferred data format was mean and standard deviation (SD), and if the median, minimum-maximum values, standard error of the mean, and/or interquartile range were provided, data were transformed to mean and SD <sup>1,2</sup>.

### *Covariates*

The study characteristics extracted were first author name, year of publication; study design, and - where relevant - type of intervention. Biological matrix (plasma/serum, blood cells, urine, saliva, cerebrospinal fluid, and brain) was recorded, and anatomical brain regions were recorded and classified as cortical, hippocampal, or cerebellar. We extracted information on measurement methodology, classified as chromatography, ELISA, comet assay, immunostaining, or other. If multiple comet assay outcomes were reported for the same sample, only one measure (preferentially total strand breaks as measured by tail length) was extracted for analysis.

We assessed study quality with the “Strengthening the Reporting of Observational Studies in Epidemiology” (STROBE) score <sup>3</sup>. STROBE score was rated by the two data extractors (IBB and ZR) independently. In the case of disagreement between the data extractors of  $\leq 2$  points, the highest score was used. In the case of disagreement with  $> 2$  points, a senior co-author (AJ) scored the paper. Using cut-offs based on the STROBE score tertiles, we categorized studies as low, medium or high quality.

For each patient and control group, the covariates extracted were number of participants; age (mean and SD); gender distribution (percent females); smoking status (percent smokers); and body mass index (BMI) (mean and SD). The diagnoses of patient groups were extracted and allocated to five overall diagnostic categories, which corresponded to the World Health Organization’s International Classification of Diseases (ICD)-10 F0-F4

categories: Dementias (DEM), substance use disorders (SUB), schizophrenia and other psychotic disorders (PSY), major depressive disorder (MDD), bipolar affective disorders (BIP), and anxiety disorders (ANX). We extracted psychometric scale name(s) and score(s) (mean and SD). If more than one rating scale were used, a senior psychiatrist selected – if possible - the one considered the most clinically relevant. Standard cut-offs scores of each scale, if available, were used to categorize illness as mild, moderate or severe (eTable 1). In bipolar patients rated with both a mania and depression scale, patients were categorized by the more severe score. Finally, we extracted information on concurrent pharmacological treatment (Y/N), where no treatment was defined as no individuals in the population used medication for the disorder in question, but other medication was allowed; and active treatment was defined as  $\geq 50\%$  of the population used medication for the disorder in question. In other or unclear situations, the variable was rated “NA”.

## eReferences

1. Luo D, Wan X, Liu J, Tong T. Optimally estimating the sample mean from the sample size, median, mid-range, and/or mid-quartile range. *Stat Methods Med Res.* 2018;27(6):1785-1805.
2. Wan X, Wang W, Liu J, Tong T. Estimating the sample mean and standard deviation from the sample size, median, range and/or interquartile range. *BMC Med Res Methodol.* 2014;14:135.
3. von Elm E, Altman DG, Egger M, et al. The Strengthening the Reporting of Observational Studies in Epidemiology (STROBE) statement: guidelines for reporting observational studies. *Lancet.* 2007;370(9596):1453-1457.

### eTable 1. Illness Severity

The following cut-off values were used to categorize severity of disease in patients. Only scales with established cut-offs for mild, moderate, and severe illness were included. In studies with other or no rating scale data, no severity measure was included.

| <b>Scale</b> | <b>Mild</b> | <b>Moderate</b> | <b>Severe</b> |
|--------------|-------------|-----------------|---------------|
| HAMD-17      | <17         | 17-23           | >23           |
| HAMD-21      | <19         | 19-25           | >25           |
| MADRS        | <20         | 20-34           | >34           |
| BDI          | <20         | 20-28           | >28           |
| YMRS         | <26         | 27-37           | <37           |
| Y-BOCS       | <14         | 14-25           | >25           |
| CGI          | <4          | 4-5             | >5            |
| PANSS        | <85         | 85-105          | >105          |
| MMSE         | >21         | 11-21           | <11           |
| Braak stage  | 1-2         | 3-4             | 5-6           |

**eFigure 1.** PRISMA Flow Diagram of the Literature Search and Study Selection

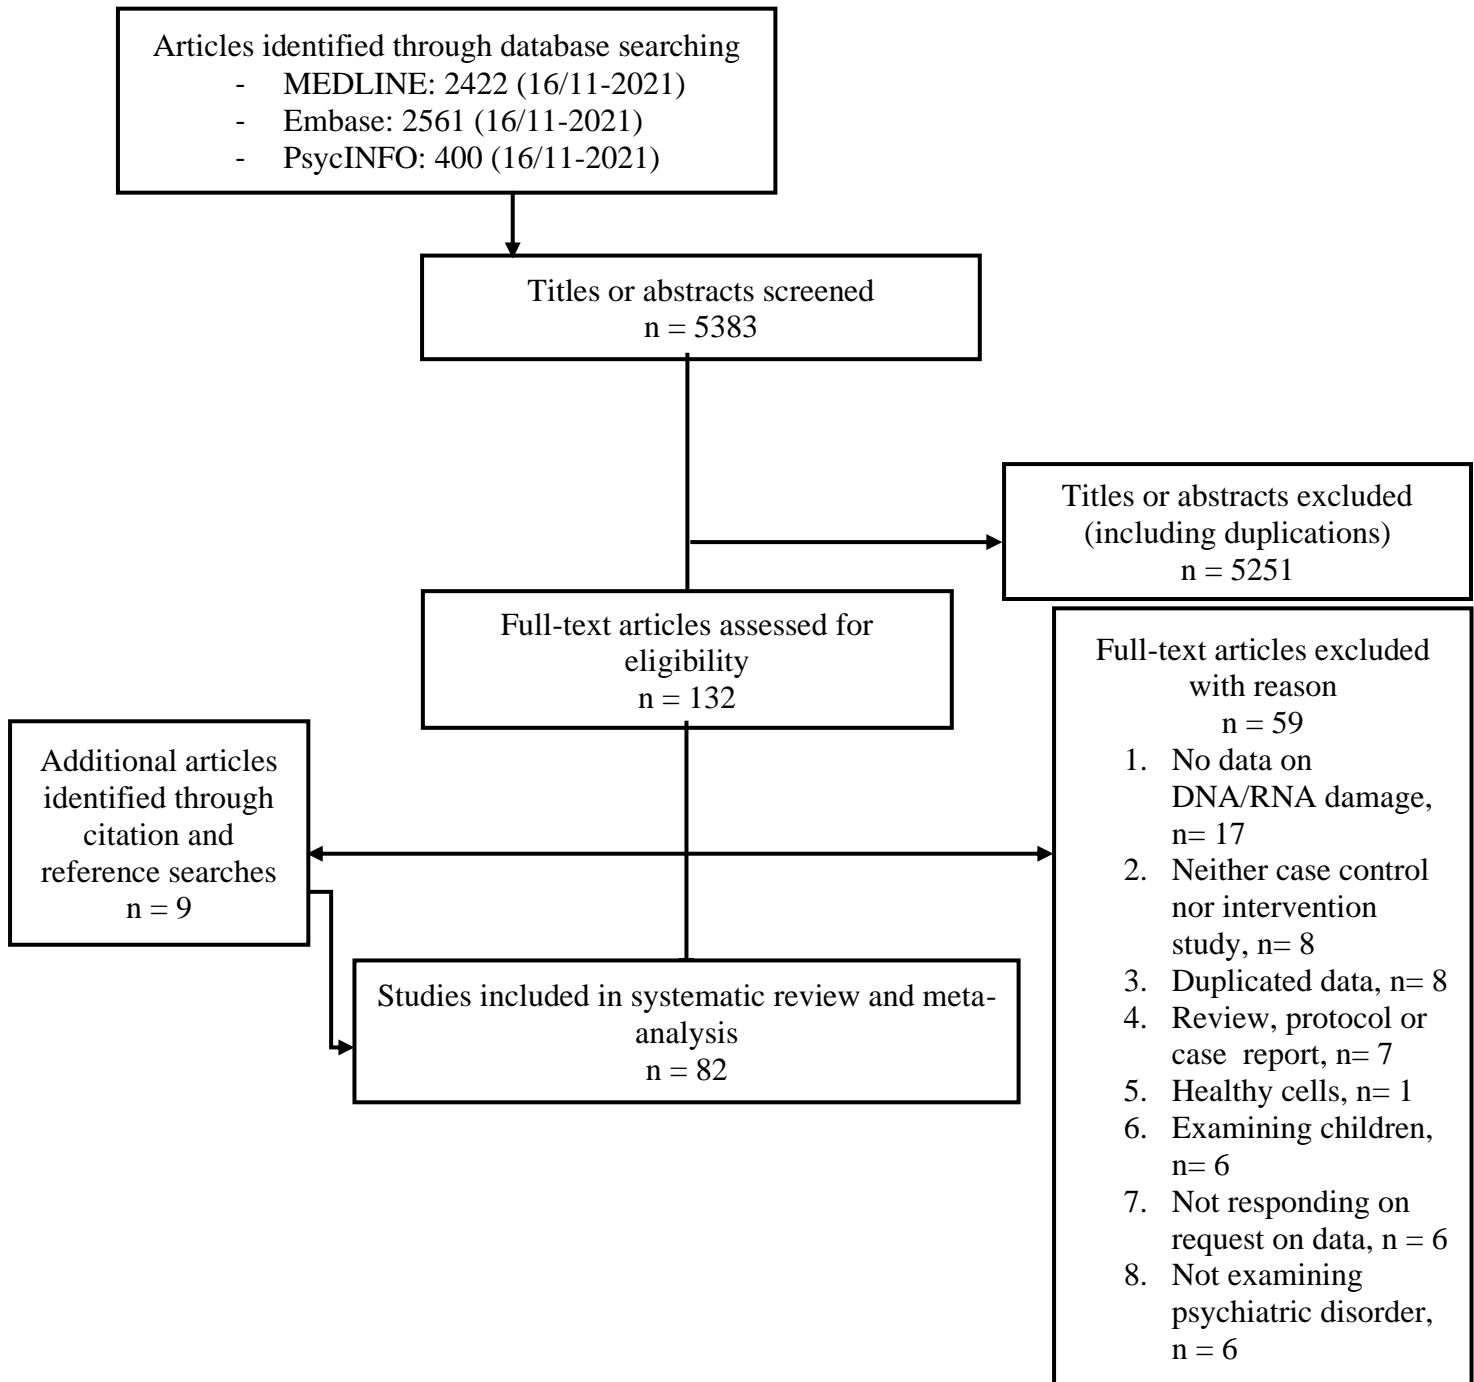

## **eTable 2.** Characteristics of Included Cross-sectional Studies

### *Summary*

The studies were published from 1994-2021. The most commonly studied biological matrix was brain (number of patient-control group comparisons (NC) = 92), followed by urine (NC = 38), plasma/serum (NC = 35), blood cells (NC = 32), CSF (NC = 6), and saliva (NC = 2). The most commonly studied nucleic acid was nDNA (NC = 140), followed by RNA (NC = 53), and mtDNA (NC = 12). Dementias (DEM) were the most commonly studied diagnostic group (NC = 90), followed by schizophrenia and other psychotic disorders (PSY) (NC = 50), major depressive disorder (MDD) (NC = 27), bipolar affective disorders (BIP) (NC = 26), substance use disorders (SUB) (NC = 10), and anxiety disorders (ANX) (NC = 2). Nine matrix/molecule combinations (blood cell RNA and mtDNA, CSF RNA, plasma/serum RNA, salivary DNA, RNA and mtDNA, cerebellar mtDNA, and hippocampal mtDNA) contained  $\leq 2$  studies and were not meta-analyzed. Thirty studies were classified as low; 28 as medium and 24 as high quality (see eAppendix for definitions)

| ID | Author, year                | Country         | STROBE score | Study quality | Disorder      | Controls                                                                  | n                                                                                                | Age                                                                                                                              | Female                                                                                                                | Severity scale             | Scale points                                                                                                                    | Patient severity | Drugs                                                                         | Smokers                                                                                    | BMI                                                                                                 | Matrix                      | Method         | Nucleic acid | Marker                  |
|----|-----------------------------|-----------------|--------------|---------------|---------------|---------------------------------------------------------------------------|--------------------------------------------------------------------------------------------------|----------------------------------------------------------------------------------------------------------------------------------|-----------------------------------------------------------------------------------------------------------------------|----------------------------|---------------------------------------------------------------------------------------------------------------------------------|------------------|-------------------------------------------------------------------------------|--------------------------------------------------------------------------------------------|-----------------------------------------------------------------------------------------------------|-----------------------------|----------------|--------------|-------------------------|
| 1  | Affifi et al. 2018          | Saudi Arabia    | 16           | Medium        | BIP           | Healthy volunteers                                                        | P: 40<br>C: 25                                                                                   | P: 32.6±8.2<br>C: 24.4±4.6                                                                                                       | P: 52.5 %<br>C: 44.0 %                                                                                                | NA                         | NA                                                                                                                              | NA               | P: Yes<br>C: No                                                               | P: NA<br>C: 0 %                                                                            | NA                                                                                                  | Plasma/serum                | ELISA          | DNA          | 8-OHdG                  |
| 2  | Ahmadimanesh et al. 2019    | Iran            | 19           | High          | MDD           | Healthy volunteers                                                        | P: 25<br>C: 14                                                                                   | P: 37.0±8.7<br>C: 34.8±8.9                                                                                                       | P: 64.0 %<br>C: 50.0 %                                                                                                | HAM-D <sub>21</sub>        | P: 27.7±8.1<br>C: NA                                                                                                            | Severe           | P: No<br>C: NA                                                                | P: 0 %<br>C: 0 %                                                                           | P: 26.2±4.6<br>C: 22.7±6.3                                                                          | Blood cells<br>Plasma/serum | Comet<br>ELISA | DNA<br>DNA   | Strand breaks<br>8-OHdG |
| 3  | Akkaya et al. 2017          | Turkey          | 13           | Low           | DEM           | Elderly cases without history of neurological disorders                   | P: 67<br>C: 42                                                                                   | P: 73.2±18.9<br>C: 75.0±18.9                                                                                                     | P: 50.0 %<br>C: 73.8 %                                                                                                | MMSE                       | NA                                                                                                                              | NA               | P: Yes<br>C: NA                                                               | P: 0 %<br>C: 0 %                                                                           | NA                                                                                                  | Blood cells                 | Comet          | DNA          | Strand breaks           |
| 4  | Alici et al. 2016           | Turkey          | 18           | High          | ANX           | Healthy volunteers                                                        | P: 42<br>C: 38                                                                                   | P: 33.0±9.0<br>C: 33.0±7.0                                                                                                       | P: 66.7 %<br>C: 63.2 %                                                                                                | Y-BOCS                     | P: 21.0±8.9<br>C: NA                                                                                                            | Moderate         | P: Yes<br>C: NA                                                               | NA                                                                                         | NA                                                                                                  | Plasma/serum                | ELISA          | DNA          | 8-OHdG                  |
| 5  | Andreazza et al. 2007       | Brazil          | 15           | Medium        | BIP           | Healthy volunteers                                                        | P: 32<br>C: 32                                                                                   | P: 43.3±12.7<br>C: 43.5±14.2                                                                                                     | P: 71.9 %<br>C: 59.4 %                                                                                                | HAM-D <sub>17</sub> , YMRS | P: 6.3±7.4,<br>3.6±3.0<br>C: NA                                                                                                 | Mild             | P: Yes<br>C: No                                                               | P: 0 %<br>C: 0 %                                                                           | NA                                                                                                  | Blood cells                 | Comet          | DNA          | Damage                  |
| 6  | Black et al. 2017           | The Netherlands | 19           | High          | MDD           | Healthy controls                                                          | P <sub>1</sub> : 1,619<br>P <sub>2</sub> : 610<br>C: 612                                         | P <sub>1</sub> : 41.2±12.4<br>P <sub>2</sub> : 44.4±12.9<br>C: 41.1±14.8                                                         | P <sub>1</sub> : 67.1 %<br>P <sub>2</sub> : 69.7 %<br>C: 60.9 %                                                       | IDS-SR                     | P <sub>1</sub> : 29.2±12.4<br>P <sub>2</sub> : 14.3±9.0<br>C: 8.4±7.4                                                           | NA               | P <sub>1</sub> : No<br>P <sub>2</sub> : No<br>C: NA                           | P <sub>1</sub> : 44.9 %<br>P <sub>2</sub> : 35.4 %<br>C: 26.3 %                            | NA                                                                                                  | Plasma/serum                | Chrom          | DNA          | 8-OHdG                  |
| 7  | Bradley-Whitman et al. 2013 | USA             | 16           | Medium        | DEM           | Normal controls                                                           | P <sub>1</sub> : 14<br>P <sub>2</sub> : 7<br>P <sub>3</sub> : 15<br>P <sub>4</sub> : 12<br>C: 15 | P <sub>1</sub> : 85.8±6.4<br>P <sub>2</sub> : 91.0±5.0<br>P <sub>3</sub> : 80.8±5.4<br>P <sub>4</sub> : 68.9±16.6<br>C: 86.3±5.4 | P <sub>1</sub> : 78.6 %<br>P <sub>2</sub> : 71.4 %<br>P <sub>3</sub> : 53.3 %<br>P <sub>4</sub> : 41.7 %<br>C: 73.3 % | Median Braak Score         | NA                                                                                                                              | NA               | NA                                                                            | NA                                                                                         | NA                                                                                                  | Brain: TC, PC, CB           | Chrom          | RNA          | 8-OHG                   |
| 8  | Cepnja et al. 2011          | Croatia         | 15           | Medium        | ANX           | Healthy controls                                                          | P: 46<br>C: 28                                                                                   | P: 43.0±6.0<br>C: 39.0±7.0                                                                                                       | P: 0 %<br>C: NA                                                                                                       | NA                         | NA                                                                                                                              | NA               | P: Yes<br>C: NA                                                               | NA                                                                                         | NA                                                                                                  | Urine                       | ELISA          | DNA          | 8-OHdG                  |
| 9  | Ceylan et al. 2018          | Turkey          | 18           | High          | BIP           | Non-psychiatric controls                                                  | P <sub>1</sub> : 37<br>P <sub>2</sub> : 18<br>P <sub>3</sub> : 20<br>C: 60                       | P <sub>1</sub> : 36.3±10.3<br>P <sub>2</sub> : 36.3±10.3<br>P <sub>3</sub> : 40.8±9.2<br>C: 36.4±11.4                            | P <sub>1</sub> : 64.9 %<br>P <sub>2</sub> : 66.7 %<br>P <sub>3</sub> : 35.0 %<br>C: 55.0 %                            | HAM-D <sub>17</sub> , YMRS | P <sub>1</sub> : 1.7±1.6,<br>0.4±0.8<br>P <sub>2</sub> : 0.5±0.9,<br>25.5±7.8<br>P <sub>3</sub> : 23.0±4.6,<br>0.2±0.7<br>C: NA | Mild, moderate   | P <sub>1</sub> : Yes<br>P <sub>2</sub> : Yes<br>P <sub>3</sub> : Yes<br>C: NA | P <sub>1</sub> : 48.6 %<br>P <sub>2</sub> : 38.9 %<br>P <sub>3</sub> : 60.0 %<br>C: 29.8 % | P <sub>1</sub> : 26.9±4.9<br>P <sub>2</sub> : 29.3±6.5<br>P <sub>3</sub> : 22.7±10.3<br>C: 25.9±4.7 | Blood cells                 | ELISA          | DNA          | 8-OHdG                  |
| 10 | Chang et al. 2015           | Taiwan          | 19           | High          | MDD           | Medically healthy controls without history of major psychiatric disorders | P: 40<br>C: 70                                                                                   | P: 42.4±15.2<br>C: 38.0±12.5                                                                                                     | P: 70.0 %<br>C: 60.0 %                                                                                                | CGI                        | NA                                                                                                                              | NA               | P: Yes<br>C: No                                                               | P: 17.5 %<br>C: 0 %                                                                        | P: 22.1±3.3<br>C: 23.0±2.7                                                                          | Blood cells                 | Other          | mtDNA        | 8-OHdG                  |
| 11 | Chang et al. 2014           | Taiwan          | 18           | High          | BIP           | Medically healthy controls without history of major psychiatric disorders | P: 40<br>C: 70                                                                                   | P: 41.5±14.6<br>C: 38.0±12.5                                                                                                     | P: 55.0 %<br>C: 60.0 %                                                                                                | CGI                        | NA                                                                                                                              | NA               | P: Yes<br>C: No                                                               | P: 12.5 %<br>C: 0 %                                                                        | NA                                                                                                  | Blood cells                 | Other          | mtDNA        | 8-OHdG                  |
| 12 | Che et al. 2010             | China           | 20           | High          | PSY, BIP, MDD | Non-neurologic non-psychiatric controls                                   | P <sub>1</sub> : 15<br>P <sub>2</sub> : 15<br>P <sub>3</sub> : 15<br>C: 15                       | P <sub>1</sub> : 45.0±12.8<br>P <sub>2</sub> : 42.0±11.2<br>P <sub>3</sub> : 47.0±8.9<br>C: 48.0±10.5                            | P <sub>1</sub> : 40.0 %<br>P <sub>2</sub> : 40.0 %<br>P <sub>3</sub> : 40.0 %<br>C: 40.0 %                            | NA                         | NA                                                                                                                              | NA               | P <sub>1</sub> : Yes<br>P <sub>2</sub> : Yes<br>P <sub>3</sub> : Yes<br>C: NA | NA                                                                                         | NA                                                                                                  | Brain: ML                   | IHC            | RNA          | 8-OHG<br>8-OHdG         |
| 13 | Chen et al. 2011            | Taiwan          | 17           | Medium        | SUB           | Healthy controls without known physical or psychiatric illnesses          | P: 79<br>C: 63                                                                                   | P: 41.0±7.0<br>C: 40.7±8.3                                                                                                       | P: 15.2 %<br>C: 7.9 %                                                                                                 | CIWA-Ar-C                  | P: 10.7±5.9<br>C: NA                                                                                                            | NA               | NA                                                                            | NA                                                                                         | NA                                                                                                  | Plasma/serum                | ELISA          | DNA          | 8-OHdG                  |
| 14 | Chestkov et al. 2018        | Russia          | 14           | Low           | PSY           | Healthy controls with no history of any psychiatric disorder              | P <sub>1</sub> : 55<br>P <sub>2</sub> : 55<br>C: 60                                              | P <sub>1</sub> : 38.0±13.0<br>P <sub>2</sub> : 38.0±13.0<br>C: 37.0±12.0                                                         | P <sub>1</sub> : 0 %<br>P <sub>2</sub> : 0 %<br>C: 0 %                                                                | PANSS                      | NA                                                                                                                              | NA               | P <sub>1</sub> : No<br>P <sub>2</sub> : Yes<br>C: NA                          | NA                                                                                         | NA                                                                                                  | Blood cells                 | Other          | DNA          | 8-oxodG                 |



|    |                                |         |    |        |     |                                                                                                               |                                                                            |                                                                                                       |                                                                                |                            |                                                                    |                  |                                                                            |                        |                                                                 |                           |                         |          |                                      |                  |
|----|--------------------------------|---------|----|--------|-----|---------------------------------------------------------------------------------------------------------------|----------------------------------------------------------------------------|-------------------------------------------------------------------------------------------------------|--------------------------------------------------------------------------------|----------------------------|--------------------------------------------------------------------|------------------|----------------------------------------------------------------------------|------------------------|-----------------------------------------------------------------|---------------------------|-------------------------|----------|--------------------------------------|------------------|
| 15 | <b>Choromanska et al. 2017</b> | Poland  | 17 | Medium | DEM | Patients attending follow up visits                                                                           | P: 80<br>C: 80                                                             | P: 80.1±6.7<br>C: 80.1±6.7                                                                            | P: 68.8 %<br>C: 68.8 %                                                         | MMSE                       | P: 13.5±2.9<br>C: 27.4±3.1                                         | Moderate         | P: Yes<br>C: Yes                                                           | P: 0 %<br>C: 0 %       | NA                                                              | Saliva, plasma/serum      | ELISA                   | DNA      | 8-OHdG                               |                  |
| 16 | <b>Christensen et al. 2018</b> | Denmark | 19 | High   | PSY | Mentally healthy living controls                                                                              | P <sub>1</sub> : 107<br>P <sub>2</sub> : 112<br>C: 321                     | P <sub>1</sub> : 46.8±13.5<br>P <sub>2</sub> : 52.4±12.5<br>C: 47.0±12.6                              | P <sub>1</sub> : 21.5 %<br>P <sub>2</sub> : 72.3 %<br>C: 21.5 %                | NA                         | NA                                                                 | NA               | NA                                                                         | NA                     | P <sub>1</sub> : 25.5±1.4<br>P <sub>2</sub> : NA<br>C: 26.1±0.8 | Urine                     | Chrom                   | DNA, RNA | 8-oxodG<br>8-oxoGuo                  |                  |
| 17 | <b>Coello et al. 2021</b>      | Denmark | 19 | High   | BIP | Healthy controls without personal or first-degree family history of psychiatric disorders                     | P: 360<br>C: 197                                                           | P: 30.6±9.5<br>C: 24.9±8.8                                                                            | P: 65.0 %<br>C: 64.5 %                                                         | HAM-D <sub>17</sub> , YMRS | P: 9.7±7.4,<br>3.4±5.2<br>C: 0.7±1.5,<br>0.4±0.7                   | Mild             | P: Yes<br>C: NA                                                            | P: 43.9 %<br>C: 11.2 % | P: 24.5±3.7<br>C: 24.0±3.0                                      | Urine                     | Chrom                   | DNA, RNA | 8-oxodG<br>8-oxoGuo                  |                  |
| 18 | <b>Copoglu et al. 2015</b>     | Turkey  | 15 | Medium | PSY | Healthy volunteers with no history of any psychiatric disorder                                                | P <sub>1</sub> : 26<br>P <sub>2</sub> : 38<br>C: 80                        | P <sub>1</sub> : 34.7±7.7<br>P <sub>2</sub> : 35.6±10.2<br>C: NA                                      | P <sub>1</sub> : 38.5 %<br>P <sub>2</sub> : 31.6 %<br>C: NA                    | PANSS                      | NA                                                                 | NA               | P <sub>1</sub> : Yes<br>P <sub>2</sub> : Yes<br>C: NA                      | NA                     | NA                                                              | Plasma/serum              | ELISA                   | DNA      | 8-OHdG                               |                  |
| 19 | <b>Cui et al. 2020</b>         | China   | 12 | Low    | PSY | Healthy controls                                                                                              | P: 54<br>C: 54                                                             | P: 38.4±11.6<br>C: 33.6±9.9                                                                           | P: 66.7 %<br>C: 75.9 %                                                         | NA                         | NA                                                                 | NA               | P: No<br>C: NA                                                             | P: 16.7 %<br>C: 14.8 % | P: 21.2±2.6<br>C: 21.3±2.3                                      | Plasma/serum              | ELISA                   | DNA      | 8-OHdG                               |                  |
| 20 | <b>Czarny et al. 2015</b>      | Poland  | 14 | Low    | MDD | Healthy controls without psychiatric disturbances                                                             | P: 40<br>C: 46                                                             | P: 40.8±15.0<br>C: 40.8±15.0                                                                          | NA                                                                             | NA                         | NA                                                                 | NA               | P: Yes<br>C: NA                                                            | NA                     | NA                                                              | Blood cells               | Comet                   | DNA      | Strand breaks<br>Alkali-labile sites |                  |
| 21 | <b>Ding et al. 2006</b>        | USA     | 10 | Low    | DEM | Control subjects                                                                                              | P <sub>1</sub> : 6<br>P <sub>2</sub> : 6<br>C: 6                           | P <sub>1</sub> : 90.2±5.2<br>P <sub>2</sub> : 81.1±8.8<br>C: 82.0±7.5                                 | P <sub>1</sub> : 66.7 %<br>P <sub>2</sub> : 66.7 %<br>C: 50.0 %                | Braak stage                | P <sub>1</sub> : 3.3±0.5<br>P <sub>2</sub> : 5.8±0.4<br>C: 1.2±0.4 | Moderate, severe | NA                                                                         | NA                     | NA                                                              | Brain: PC                 | Other                   | RNA      | 8-OHG                                |                  |
| 22 | <b>Dorszewska et al. 2009</b>  | Poland  | 12 | Low    | DEM | Controls without verifiable symptoms of dementia or any other neurological disorder                           | P: 41<br>C: 51                                                             | P: 72.5±11<br>C: 51.1±21                                                                              | P: 39.0 %<br>C: 39.2 %                                                         | MMSE                       | NA                                                                 | NA               | NA                                                                         | NA                     | NA                                                              | NA                        | Blood cells             | Chrom    | DNA                                  | 8-oxo2dG         |
| 23 | <b>Ershova et al. 2017</b>     | Russia  | 16 | Medium | PSY | Healthy controls with no history of any psychiatric disorder                                                  | P <sub>1</sub> : 58<br>P <sub>2</sub> : 11<br>P <sub>3</sub> : 14<br>C: 30 | P <sub>1</sub> : 41.5±10.2<br>P <sub>2</sub> : 41.8±10.3<br>P <sub>3</sub> : 43.2±6.7<br>C: 41.0±12.0 | P <sub>1</sub> : 0 %<br>P <sub>2</sub> : 0 %<br>P <sub>3</sub> : 0 %<br>C: 0 % | PANSS                      | NA                                                                 | NA               | P <sub>1</sub> : No<br>P <sub>2</sub> : No<br>P <sub>3</sub> : No<br>C: NA | NA                     | NA                                                              | Blood cells, plasma/serum | Other                   | DNA      | 8-oxodG                              |                  |
| 24 | <b>Forlenza et al. 2006</b>    | Canada  | 18 | High   | MDD | Healthy controls with no history of psychiatric illness                                                       | P: 84<br>C: 85                                                             | P: 28.7±9.0<br>C: 28.9±8.9                                                                            | P: 81.0 %<br>C: 81.2 %                                                         | HAM-D <sub>17</sub>        | P: 19.0±5.1<br>C: 0.4±0.9                                          | Moderate         | P: No<br>C: No                                                             | P: 32.1 %<br>C: 5.9 %  | P: 29.2±9.7<br>C: 26.8±6.5                                      | Plasma/serum              | ELISA                   | DNA      | 8-OHdG                               |                  |
| 25 | <b>Gabbita et al. 1998</b>     | USA     | 14 | Low    | DEM | Controls without history of dementia or other neurological disorders or systemic diseases affecting the brain | P: 9<br>C: 11                                                              | P: 83.5±2.0<br>C: 77.6±2.6                                                                            | NA                                                                             | NA                         | NA                                                                 | NA               | NA                                                                         | NA                     | NA                                                              | NA                        | Brain: FC, PC, TC, CB   | Chrom    | DNA                                  | 8-hydroxyguanine |
| 26 | <b>Gackowski et al. 2008</b>   | Poland  | 13 | Low    | DEM | Controls matched by eating habits, age, body                                                                  | P: 18<br>C: 33                                                             | P: 71.8±7.8<br>C: NA                                                                                  | P: 55.6 %<br>C: 57.6 %                                                         | MMSE                       | NA                                                                 | NA               | NA                                                                         | NA                     | NA                                                              | NA                        | Blood cells, urine, CSF | Chrom    | DNA                                  | 8-oxodG          |

|    |                                      |         |    |        |     |                                                                                                                                                  |                                                        |                                                                       |                                                        |                            |                                                                   |          |                                                       |                                                                |                                                                       |                       |       |            |                     |
|----|--------------------------------------|---------|----|--------|-----|--------------------------------------------------------------------------------------------------------------------------------------------------|--------------------------------------------------------|-----------------------------------------------------------------------|--------------------------------------------------------|----------------------------|-------------------------------------------------------------------|----------|-------------------------------------------------------|----------------------------------------------------------------|-----------------------------------------------------------------------|-----------------------|-------|------------|---------------------|
|    |                                      |         |    |        |     | weight, smoking status                                                                                                                           |                                                        |                                                                       |                                                        |                            |                                                                   |          |                                                       |                                                                |                                                                       |                       |       |            |                     |
| 27 | <b>Götz et al. 2001</b>              | Germany | 14 | Low    | SUB | Controls without history or neuropathological evidence of neurologic or psychiatric disorders who had consumed alcohol only on special occasions | P: 12<br>C: 17                                         | P: 62.9±9.0<br>C: 66.9±11.3                                           | P: 25.0 %<br>C: 41.2 %                                 | NA                         | NA                                                                | NA       | NA                                                    | NA                                                             | NA                                                                    | Brain: FC, TC, PC, CB | Chrom | DNA, mtDNA | 8-OHdG              |
| 28 | <b>Hosseini-Ghalibaf et al. 2019</b> | Iran    | 19 | High   | BIP | Controls                                                                                                                                         | P: 35<br>C: 35                                         | P: NA<br>C: 38.2±8.4                                                  | NA                                                     | MADRS                      | NA                                                                | NA       | NA                                                    | NA                                                             | NA                                                                    | Urine, saliva         | ELISA | DNA        | 8-OHdG              |
| 29 | <b>Huang et al. 2018</b>             | Taiwan  | 17 | Medium | SUB | Healthy controls with no known physical or psychiatric illnesses not fulfilling the diagnostic criteria for drug or alcohol abuse                | P: 182<br>C: 71                                        | P: 31.1±8.3<br>C: 27.1±7.7                                            | P: 21.4 %<br>C: 4.2 %                                  | AUDIT                      | P: 4.0±6.0<br>C: NA                                               | NA       | NA                                                    | P: 95.2 %<br>C: NA                                             | NA                                                                    | Plasma/serum          | ELISA | DNA        | 8-OHdG              |
| 30 | <b>Huang et al. 2014</b>             | Taiwan  | 17 | Medium | SUB | Alcohol dependence without delirium tremens                                                                                                      | P: 16<br>C: 58                                         | P: 44.4±8.4<br>C: 40.6±5.9                                            | P: 0 %<br>C: 12.1 %                                    | CIWA-Ar-C                  | P: 30.4±7.2<br>C: 14.0±7.3                                        | NA       | NA                                                    | NA                                                             | NA                                                                    | Plasma/serum          | ELISA | DNA        | 8-OHdG              |
| 31 | <b>Huzayyin et al. 2014</b>          | Canada  | 16 | Medium | BIP | Healthy controls with no personal or family history of psychiatric illness among 1 <sup>st</sup> and 2 <sup>nd</sup> degree relatives            | P: 14<br>C: 16                                         | P: 44.7±10.9<br>C: 45.8±13.5                                          | P: 42.9 %<br>C: 60.0 %                                 | NA                         | NA                                                                | NA       | P: Yes<br>C: NA                                       | NA                                                             | NA                                                                    | Blood cells           | ELISA | DNA        | 8-OHdG              |
| 32 | <b>Ibrahim et al. 2020</b>           | Egypt   | 14 | Low    | PSY | Healthy volunteers with no evidence of mental illness                                                                                            | P <sub>1</sub> : 150<br>P <sub>2</sub> : 150<br>C: 150 | P <sub>1</sub> : 51.6±4.0<br>P <sub>2</sub> : 53.1±4.0<br>C: 51.5±3.8 | P <sub>1</sub> : 0 %<br>P <sub>2</sub> : 0 %<br>C: 0 % | PANSS                      | P <sub>1</sub> : 73.2±11.5<br>P <sub>2</sub> : 80.1±10.0<br>C: NA | Mild     | P <sub>1</sub> : Yes<br>P <sub>2</sub> : Yes<br>C: NA | P <sub>1</sub> : 28.0 %<br>P <sub>2</sub> : 54.0 %<br>C: 8.0 % | P <sub>1</sub> : 23.7±3.0<br>P <sub>2</sub> : 24.7±3.4<br>C: 23.3±2.9 | Plasma/serum          | ELISA | DNA        | 8-OHdG              |
| 33 | <b>Irie et al. 2005</b>              | Japan   | 19 | High   | MDD | Healthy controls                                                                                                                                 | P: 30<br>C: 60                                         | P: 49.4±13.7<br>C: 48.1±11.7                                          | P: 33.3 %<br>C: 33.3 %                                 | CES-D                      | P: 21.4±11.3<br>C: 13.7±6.5                                       | NA       | P: Yes<br>C: NA                                       | P: 43.3 %<br>C: 31.7 %                                         | P: 23.1±3.5<br>C: 22.5±2.4                                            | Blood cells           | Chrom | DNA        | 8-OHdG              |
| 34 | <b>Isobe et al. 2009</b>             | Japan   | 13 | Low    | DEM | Neurologically normal patients who underwent lumbar anesthesia for minor surgery                                                                 | P: 18<br>C: 15                                         | P: 67.4±9.2<br>C: 65.7±9.2                                            | P: 61.1 %<br>C: 40.0 %                                 | MMSE                       | P: 16.5±3.5<br>C: NA                                              | Moderate | P: No<br>C: NA                                        | NA                                                             | NA                                                                    | CSF, plasma/serum     | Chrom | RNA        | 8-OHG               |
| 35 | <b>Isobe et al. 2010</b>             | Japan   | 13 | Low    | DEM | Controls with no neurological disease                                                                                                            | P: 30<br>C: 30                                         | P: 69.0±4.1<br>C: 64.8±16.4                                           | P: 56.7 %<br>C: 53.3 %                                 | MMSE                       | P: 18.4±2.1<br>C: NA                                              | Moderate | P: No<br>C: NA                                        | NA                                                             | NA                                                                    | CSF                   | Chrom | DNA        | 8-OHdG              |
| 36 | <b>Jacoby et al. 2016</b>            | Denmark | 18 | High   | BIP | Healthy controls                                                                                                                                 | P: 54<br>C: 35                                         | P: 41.9±11.9<br>C: 36.7±11.6                                          | P: 40.7 %<br>C: 42.9 %                                 | HAM-D <sub>17</sub> , YMRS | P: 5.1±5.5,<br>23.8±6.4<br>C: 1.7±1.9,<br>1.0±1.7                 | Mild     | P: Yes<br>C: NA                                       | P: 57.4 %<br>C: 20.0 %                                         | P: 26.3±4.9<br>C: 22.6±4.0                                            | Urine                 | Chrom | DNA, RNA   | 8-oxodG<br>8-oxoGuo |

|    |                         |                 |    |      |               |                                                                                                |                                                               |                                                                                                       |                                                                                            |                            |                                                                      |                  |                                                       |                                                                                            |                                                                                                    |              |       |          |                      |
|----|-------------------------|-----------------|----|------|---------------|------------------------------------------------------------------------------------------------|---------------------------------------------------------------|-------------------------------------------------------------------------------------------------------|--------------------------------------------------------------------------------------------|----------------------------|----------------------------------------------------------------------|------------------|-------------------------------------------------------|--------------------------------------------------------------------------------------------|----------------------------------------------------------------------------------------------------|--------------|-------|----------|----------------------|
| 37 | Jørgensen et al. 2018   | Denmark         | 20 | High | PSY, BIP, MDD | Type 2 diabetes mellitus and no psychiatric illness                                            | P: 28<br>P <sub>2</sub> : 8<br>P <sub>3</sub> : 4<br>C: 1,312 | P <sub>1</sub> : 61.7±10.4<br>P <sub>2</sub> : 59.0±11.9<br>P <sub>3</sub> : 59.0±9.5<br>C: 64.7±11.5 | P <sub>1</sub> : 67.9 %<br>P <sub>2</sub> : 50.0 %<br>P <sub>3</sub> : 75.0 %<br>C: 46.4 % | NA                         | NA                                                                   | NA               | NA                                                    | P <sub>1</sub> : 63.0 %<br>P <sub>2</sub> : 42.9 %<br>P <sub>3</sub> : 50.0 %<br>C: 33.9 % | P <sub>1</sub> : 32.3±7.3<br>P <sub>2</sub> : 29.8±4.9<br>P <sub>3</sub> : 32.2±9.3<br>C: 29.6±5.2 | Urine        | Chrom | DNA, RNA | 8-oxodG<br>8-oxoGuo  |
| 38 | Jørgensen et al. 2013   | Denmark         | 20 | High | MDD           | Healthy controls                                                                               | P <sub>1</sub> : 26<br>P <sub>2</sub> : 29<br>C: 28           | P <sub>1</sub> : 41.7±8.5<br>P <sub>2</sub> : 46.2±17.0<br>C: 38.9±13.7                               | P <sub>1</sub> : 57.7 %<br>P <sub>2</sub> : 51.7 %<br>C: 60.7 %                            | HAM-D <sub>17</sub>        | P <sub>1</sub> : 18.6±2.4<br>P <sub>2</sub> : 26.9±4.5<br>C: 1.0±1.4 | Moderate, severe | P <sub>1</sub> : No<br>P <sub>2</sub> : Yes<br>C: NA  | P <sub>1</sub> : 42.3 %<br>P <sub>2</sub> : 44.8 %<br>C: 10.7 %                            | P <sub>1</sub> : 27.5±5.2<br>P <sub>2</sub> : 24.3±4.7<br>C: 26.8±7.6                              | Urine        | Chrom | DNA, RNA | 8-oxodG<br>8-oxoGuo  |
| 39 | Jørgensen et al. 2013   | Denmark         | 18 | High | PSY           | Healthy controls                                                                               | P: 40<br>C: 40                                                | P: 33.0±10.7<br>C: 31.4±9.8                                                                           | P: 50.0 %<br>C: 50.0 %                                                                     | PANSS                      | P: 89.1±16.5<br>C: NA                                                | Moderate         | P: Yes<br>C: NA                                       | P: 55.0 %<br>C: 21.0 %                                                                     | P: 27.2±5.7<br>C: 25.1±3.8                                                                         | Urine        | Chrom | DNA, RNA | 8-oxodG<br>8-oxoGuo  |
| 40 | Kadioglu et al. 2004    | Turkey          | 13 | Low  | DEM           | Healthy elderly people without verifiable symptoms of dementia or other neurological disorders | P: 24<br>C: 21                                                | P: 72.2<br>C: 68.4                                                                                    | NA                                                                                         | MMSE                       | NA                                                                   | NA               | NA                                                    | P: 4.2 %<br>C: 4.8 %                                                                       | NA                                                                                                 | Blood cells  | Comet | DNA      | Single strand breaks |
| 41 | Kilic et al. 2019       | Turkey          | 18 | High | PSY           | Healthy volunteers                                                                             | P <sub>1</sub> : 27<br>P <sub>2</sub> : 27<br>C: 27           | P <sub>1</sub> : 35.7±7.4<br>P <sub>2</sub> : 35.0±9.2<br>C: 32.1±5.2                                 | P <sub>1</sub> : 40.7 %<br>P <sub>2</sub> : 37.0 %<br>C: 37.0 %                            | CGI                        | P <sub>1</sub> : 5.0±1.0<br>P <sub>2</sub> : 2.4±0.6<br>C: NA        | Moderate, mild   | P <sub>1</sub> : Yes<br>P <sub>2</sub> : Yes<br>C: NA | P <sub>1</sub> : 55.6 %<br>P <sub>2</sub> : 51.9 %<br>C: 48.1 %                            | P <sub>1</sub> : 29.1±4.3<br>P <sub>2</sub> : 29.3±4.3<br>C: 28.6±4.5                              | Plasma/serum | ELISA | DNA      | 8-OHdG               |
| 42 | Knorr et al. 2019       | Denmark         | 19 | High | BIP           | Healthy controls with no personal or first-degree family history of psychiatric disorders      | P: 86<br>C: 44                                                | P: 33.4±12.8<br>C: 32.1±13.0                                                                          | P: 51.0 %<br>C: 54.0 %                                                                     | HAM-D <sub>17</sub> , YMRS | P: 3.0±3.0,<br>1.0±1.5<br>C: 0±0, 0±0                                | Mild             | P: Yes<br>C: NA                                       | P: 34 %<br>C: 18 %                                                                         | P: 25.3±4.9<br>C: 24.9±3.4                                                                         | CSF, urine   | Chrom | DNA, RNA | 8-oxodG<br>8-oxoGuo  |
| 43 | Kume et al. 2012        | Japan           | 18 | High | DEM           | Non-demented elderly controls                                                                  | P: 33<br>C: 35                                                | P: 80.3±4.9<br>C: 79.5±6.4                                                                            | P: 48.5 %<br>C: 60.0 %                                                                     | MMSE                       | P: 21.8±4.0<br>C: 27.1±2.4                                           | Mild             | NA                                                    | P: 12.1 %<br>C: 25.7 %                                                                     | NA                                                                                                 | Urine        | Chrom | DNA      | 8-OHdG               |
| 44 | Kupper et al. 2009      | The Netherlands | 18 | High | MDD           | Chronic heart failure and no depression                                                        | P: 38<br>C: 72                                                | NA                                                                                                    | NA                                                                                         | BDI                        | NA                                                                   | NA               | NA                                                    | NA                                                                                         | NA                                                                                                 | Plasma/serum | ELISA | DNA      | 8-OHdG               |
| 45 | Kwiatkowski et al. 2016 | Poland          | 14 | Low  | DEM           | Randomly selected patients from other departments                                              | P: 105<br>C: 130                                              | P: 82.3±7.3<br>C: 78.4±10.3                                                                           | P: 55.2 %<br>C: 56.9 %                                                                     | NA                         | NA                                                                   | NA               | NA                                                    | NA                                                                                         | NA                                                                                                 | Blood cells  | Comet | DNA      | Total basal damage   |
| 46 | Lee et al. 2007         | South Korea     | 12 | Low  | DEM           | Healthy people with no verifiable symptoms of dementia or other neurological disorders         | P: 36<br>C: 34                                                | P: 77.1±7.4<br>C: 76.4±7.3                                                                            | P: 100 %<br>C: 100 %                                                                       | MMSE                       | P: 17.5±4.2<br>C: 29.4±2.8                                           | Moderate         | NA                                                    | P: 4.9 %<br>C: 4.0 %                                                                       | NA                                                                                                 | Urine        | Chrom | DNA      | 8-OHdG               |
| 47 | Lindqvist et al. 2017   | USA             | 20 | High | MDD           | Healthy controls                                                                               | P: 50<br>C: 55                                                | P: 39.6±14.7<br>C: 37.6±13.9                                                                          | P: 54.0 %<br>C: 60.0 %                                                                     | HAM-D <sub>17</sub>        | P: 20.2±3.3<br>C: NA                                                 | Moderate         | P: No<br>C: NA                                        | P: 26.0 %<br>C: 6.0 %                                                                      | P: 26.1±4.5<br>C: 24.4±4.9                                                                         | Plasma/serum | Chrom | DNA      | 8-OHdG               |
| 48 | Liu et al. 2018         | China           | 18 | High | MDD           | No post-stroke depression                                                                      | P: 70<br>C: 171                                               | P: 64.0±10.6<br>C: 63.3±10.5                                                                          | P: 35.7 %<br>C: 35.7 %                                                                     | HAM-D <sub>17</sub>        | NA                                                                   | NA               | P: No<br>C: No                                        | P: 30.0 %<br>C: 29.2 %                                                                     | P: 24.5±3.7<br>C: 24.2±3.0                                                                         | Plasma/serum | ELISA | DNA      | 8-OHdG               |

|    |                            |         |    |        |     |                                                                                                          |                                                     |                                                                       |                                                                 |                            |                                                                 |                |                                                     |                     |                            |                       |            |          |                       |
|----|----------------------------|---------|----|--------|-----|----------------------------------------------------------------------------------------------------------|-----------------------------------------------------|-----------------------------------------------------------------------|-----------------------------------------------------------------|----------------------------|-----------------------------------------------------------------|----------------|-----------------------------------------------------|---------------------|----------------------------|-----------------------|------------|----------|-----------------------|
| 49 | Lovell et al. 2011         | USA     | 17 | Medium | DEM | Normal controls                                                                                          | P: 10<br>C: 8<br>C: 5                               | P: 86.0±6.6<br>C: 83.9±5.4                                            | P: 80.0 %<br>C: 87.5 %                                          | MMSE                       | P: 28.5±1.3<br>C: 28.1±1.4                                      | Mild           | NA                                                  | NA                  | NA                         | Brain: ML             | IHC        | DNA, RNA | 8-OHG                 |
|    |                            |         |    |        |     |                                                                                                          | Chrom                                               | DNA                                                                   | 8-OHG                                                           |                            |                                                                 |                |                                                     |                     |                            |                       |            |          |                       |
| 50 | Lovell et al. 2001         | USA     | 13 | Low    | DEM | Controls without a history of dementia or other neurological disorders                                   | P: 18<br>C: 7                                       | P: 79.9±10.6<br>C: 80.0±6.9                                           | P: 61.1 %<br>C: 42.9 %                                          | Mean Braak Stage           | P: 5.7±0.9<br>C: 1.3±1.3                                        | Severe         | NA                                                  | NA                  | NA                         | CSF                   | Chrom      | DNA      | 8-OHG                 |
| 51 | Lyras et al. 1997          | England | 16 | Medium | DEM | Controls with no history of psychiatric or neurological illness                                          | P: 10<br>C: 10                                      | P: 79.9±6.1<br>C: 74.1±16.0                                           | P: 80.0 %<br>C: 60.0 %                                          | NA                         | NA                                                              | NA             | P: No<br>C: No                                      | NA                  | NA                         | Brain: FC, PC, TC, OC | Chrom      | DNA      | 8-hydroxyguanine      |
|    |                            |         |    |        |     |                                                                                                          | P: 12<br>C: 9                                       | P: 78.3±9.2<br>C: 69.5±9.4                                            | P: 66.7 %<br>C: 22.2 %                                          | NA                         | NA                                                              | NA             | P: No<br>C: No                                      | NA                  | NA                         | Brain: TC             | Chrom      | DNA      | 8-hydroxyguanine      |
|    |                            |         |    |        |     |                                                                                                          | P: 12<br>C: 8                                       | P: 78.3±9.2<br>C: 69.5±10.1                                           | P: 66.7 %<br>C: 25.0 %                                          | NA                         | NA                                                              | NA             | P: No<br>C: No                                      | NA                  | NA                         | Brain: ML             | Chrom      | DNA      | 8-hydroxyguanine      |
|    |                            |         |    |        |     |                                                                                                          | P: 7<br>C: 8                                        | P: 77.6±9.3<br>C: 68.5±9.5                                            | P: 85.7 %<br>C: 25.0 %                                          | NA                         | NA                                                              | NA             | P: No<br>C: No                                      | NA                  | NA                         | Brain: ML             | Chrom      | DNA      | 8-hydroxyguanine      |
| 52 | Lyras et al. 1998          | England | 14 | Low    | DEM | Controls                                                                                                 | P: 8<br>C: 8                                        | P: 78.5±7.1<br>C: 70.8±10.0                                           | NA                                                              | NA                         | NA                                                              | NA             | NA                                                  | NA                  | NA                         | Brain: FC, PC         | Chrom      | DNA      | Guanine base products |
|    |                            |         |    |        |     |                                                                                                          | P: 4<br>C: 4                                        | P: 74.0±4.2<br>C: 64.5±8.1                                            | NA                                                              | NA                         | NA                                                              | NA             | NA                                                  | NA                  | NA                         | Brain: TC             | Chrom      | DNA      | Guanine base products |
|    |                            |         |    |        |     |                                                                                                          | P: 6<br>C: 6                                        | P: 77.3±6.1<br>C: 69.3±7.9                                            | NA                                                              | NA                         | NA                                                              | NA             | NA                                                  | NA                  | NA                         | Brain: OC             | Chrom      | DNA      | Guanine base products |
| 53 | Mecocci et al. 2002        | Italy   | 12 | Low    | DEM | Healthy aged controls                                                                                    | P: 40<br>C: 39                                      | P: 75.9±5.4<br>C: 74.8±6.3                                            | P: 50.0 %<br>C: 51.3 %                                          | MMSE                       | P: 17.3±2.1<br>C: NA                                            | Moderate       | NA                                                  | P: 0 %<br>C: 0 %    | NA                         | Blood cells           | Chrom      | DNA      | 8-OHdG                |
| 54 | Mecocci et al. 1994        | USA     | 11 | Low    | DEM | Controls                                                                                                 | P: 13<br>C: 13                                      | P: 71.4±4.7<br>C: 75.4±9.7                                            | P: 38.5 %<br>C: 38.5 %                                          | NA                         | NA                                                              | NA             | NA                                                  | NA                  | Brain: FC, PC, TC, CB      | Chrom                 | DNA, mtDNA | 8-OHdG   |                       |
| 55 | Migliore et al. 2005       | Italy   | 13 | Low    | DEM | Healthy controls                                                                                         | P <sub>1</sub> : 20<br>P <sub>2</sub> : 15<br>C: 15 | P <sub>1</sub> : 71.1±6.7<br>P <sub>2</sub> : 66.5±6.8<br>C: 65.8±9.1 | P <sub>1</sub> : 70.0 %<br>P <sub>2</sub> : 40.0 %<br>C: 60.0 % | MMSE                       | P <sub>1</sub> : 17.7±4.7<br>P <sub>2</sub> : 25.2±4.5<br>C: NA | Moderate, mild | P <sub>1</sub> : No<br>P <sub>2</sub> : No<br>C: NA | NA                  | NA                         | Blood cells           | Comet      | DNA      | Single strand breaks  |
| 56 | Mórocz et al. 2002         | Hungary | 14 | Low    | DEM | Controls with no verifiable symptoms of dementia or other internal and neurological disorders            | P: 27<br>C: 12                                      | P: 72.0±6.7<br>C: 72.3±9.4                                            | P: 63.0 %<br>C: 58.3 %                                          | MMSE                       | P: 18.6±4.3<br>C: 27.5±1.1                                      | Moderate       | P: No<br>C: No                                      | P: 0 %<br>C: 0 %    | NA                         | Blood cells           | Comet      | DNA      | Single strand breaks  |
| 57 | Munkholm et al. 2015       | Denmark | 19 | High   | BIP | Healthy controls with no history of psychiatric disorder in the subjects or their first-degree relatives | P: 37<br>C: 40                                      | P: 40.9±12.3<br>C: 36.3±12.5                                          | P: 67.6 %<br>C: 57.5 %                                          | HAM-D <sub>17</sub> , YMRS | NA                                                              | NA             | P: Yes<br>C: NA                                     | P: 76.0 %<br>C: 0 % | P: 24.6±3.6<br>C: 24.9±3.9 | Urine                 | Chrom      | DNA, RNA | 8-oxodG<br>8-oxoGuo   |
| 58 | Muraleedharan et al. 2015  | India   | 17 | Medium | PSY | Healthy controls screened negative for psychiatric morbidity                                             | P: 40<br>C: 40                                      | P: 30.6±8.5<br>C: NA                                                  | P: 47.5 %<br>C: 47.5 %                                          | NA                         | NA                                                              | NA             | P: No<br>C: NA                                      | P: 20.0 %<br>C: NA  | NA                         | Blood cells           | Comet      | DNA      | Comet                 |
| 59 | Mutlu-Türkoglu et al. 2000 | Turkey  | 11 | Low    | SUB | Controls                                                                                                 | P: 28<br>C: 15                                      | P: 39.2±8.7<br>C: 38.3±13.4                                           | P: 14.3 %<br>C: 20.0 %                                          | NA                         | NA                                                              | NA             | NA                                                  | NA                  | NA                         | Blood cells           | Comet      | DNA      | Damage                |
| 60 | Nishioka et al. 2004       | USA     | 16 | Medium | PSY | Elderly non-psychiatric controls                                                                         | P: 10<br>C: 13                                      | P: 75.2±9.9<br>C: 75.5±9.9                                            | P: 70.0 %<br>C: 69.0 %                                          | NA                         | NA                                                              | NA             | P: Yes<br>C: NA                                     | NA                  | NA                         | Brain: ML             | IHC        | DNA      | 8-OHdG                |
| 61 | Nordholm et al. 2016       | Denmark | 17 | Medium | PSY | Healthy controls without severe mental illness                                                           | P <sub>1</sub> : 41<br>P <sub>2</sub> : 35<br>C: 29 | P <sub>1</sub> : 23.9±4.7<br>P <sub>2</sub> : 23.3±5.6<br>C: 24.7±4.9 | P <sub>1</sub> : 56.1 %<br>P <sub>2</sub> : 45.0 %<br>C: 41.3 % | PANSS                      | P <sub>1</sub> : 79.7±14.1<br>P <sub>2</sub> : NA<br>C: NA      | Mild           | P <sub>1</sub> : No<br>P <sub>2</sub> : No<br>C: NA | NA                  | NA                         | Urine                 | Chrom      | DNA, RNA | 8-oxodG<br>8-oxoGuo   |

|    |                                    |                 |    |        |          |                                                                                                                                            |                                                                        |                                                                                                    |                                                                 |             |                                                                            |                  |                                                       |                                                                 |    |                           |       |     |         |
|----|------------------------------------|-----------------|----|--------|----------|--------------------------------------------------------------------------------------------------------------------------------------------|------------------------------------------------------------------------|----------------------------------------------------------------------------------------------------|-----------------------------------------------------------------|-------------|----------------------------------------------------------------------------|------------------|-------------------------------------------------------|-----------------------------------------------------------------|----|---------------------------|-------|-----|---------|
| 62 | <b>Nunomura et al. 2004</b>        | Japan           | 11 | Low    | DEM      | Controls without dementia                                                                                                                  | P: 13<br>C: 15                                                         | P: 59.0<br>C: 66.0                                                                                 | P: 84.6 %<br>C: 53.3 %                                          | NA          | NA                                                                         | NA               | NA                                                    | NA                                                              | NA | Brain                     | IHC   | RNA | 8-OHG   |
| 63 | <b>Nunomura et al. 2012</b>        | Japan           | 13 | Low    | DEM      | Controls with normal cognitive functions free of amyloid plaques and neurofibrillary tangles                                               | P <sub>1</sub> : 4<br>P <sub>2</sub> : 6<br>P <sub>3</sub> : 5<br>C: 5 | P <sub>1</sub> : 88.8±4.3<br>P <sub>2</sub> : 93.5±4.5<br>P <sub>3</sub> : 85.4±8.1<br>C: 88.4±5.7 | NA                                                              | CDR         | P <sub>1</sub> : 0<br>P <sub>2</sub> : 0.5<br>P <sub>3</sub> : 1.0<br>C: 0 | NA               | NA                                                    | NA                                                              | NA | Brain: TC, CB             | IHC   | RNA | 8-OHG   |
| 64 | <b>Peña-Bautista et al. 2019</b>   | Spain           | 17 | Medium | DEM      | Elderly controls with absence of cognitive disturbances                                                                                    | P: 53<br>C: 27                                                         | P: 70.5±5.8<br>C: 66.0±8.0                                                                         | P: 60.4 %<br>C: 37.0 %                                          | MMSE        | P: 24.0±6.0<br>C: 30.0±2.0                                                 | Mild             | P: Yes<br>C: Yes                                      | P: 34.0 %<br>C: 44.0 %                                          | NA | Urine                     | Chrom | DNA | 8-OHdG  |
| 65 | <b>Psimadas et al. 2004</b>        | Greece          | 13 | Low    | PSY      | Controls                                                                                                                                   | P <sub>1</sub> : 11<br>P <sub>2</sub> : 9<br>C: 20                     | P <sub>1</sub> : 38.3±1.1<br>P <sub>2</sub> : 39.7±1.5<br>C: 38.8±2.2                              | P <sub>1</sub> : 0 %<br>P <sub>2</sub> : 0 %<br>C: 0 %          | NA          | NA                                                                         | NA               | P <sub>1</sub> : Yes<br>P <sub>2</sub> : Yes<br>C: NA | P <sub>1</sub> : 100 %<br>P <sub>2</sub> : 100 %<br>C: 100 %    | NA | Blood cells               | Comet | DNA | Damage  |
| 66 | <b>Shimano et al. 2017</b>         | Japan           | 18 | High   | MDD      | Depressive symptoms low                                                                                                                    | P: 1,449<br>C: 5,068                                                   | NA                                                                                                 | P: NA<br>C: 62.4 %                                              | SDS         | NA                                                                         | NA               | NA                                                    | NA                                                              | NA | Urine                     | Chrom | DNA | 8-OHdG  |
| 67 | <b>Shmarina et al. 2020</b>        | Russia          | 11 | Low    | PSY      | Healthy controls without somatic or neurological pathology                                                                                 | P <sub>1</sub> : 40<br>P <sub>2</sub> : 22<br>C: 25                    | P <sub>1</sub> : 40.4±9.8<br>P <sub>2</sub> : 42.2±5.9<br>C: NA                                    | P <sub>1</sub> : 0 %<br>P <sub>2</sub> : 0 %<br>C: 0 %          | PANSS       | NA                                                                         | NA               | P <sub>1</sub> : No<br>P <sub>2</sub> : No<br>C: NA   | NA                                                              | NA | Blood cells, plasma/serum | Other | DNA | 8-oxodG |
| 68 | <b>Silva et al. 2014</b>           | Brazil          | 14 | Low    | DEM      | Controls without neuropathological Alzheimer's disease and normal cognitive function                                                       | P <sub>1</sub> : 19<br>P <sub>2</sub> : 12<br>C: 31                    | P <sub>1</sub> : 86.1±5.9<br>P <sub>2</sub> : 85.3±5.0<br>C: 84.6±4.3                              | P <sub>1</sub> : 84.2 %<br>P <sub>2</sub> : 61.5 %<br>C: 51.6 % | Braak       | P <sub>1</sub> : 5.1±0.9<br>P <sub>2</sub> : 4.3±0.9<br>C: 2.0±0.8         | Severe, moderate | NA                                                    | NA                                                              | NA | Brain: ML                 | IHC   | DNA | 8-OHdG  |
| 69 | <b>Sliwiska et al. 2016</b>        | Poland          | 15 | Medium | DEM      | Healthy volunteers without neurodegenerative disorders or a family history of AD                                                           | P: 100<br>C: 110                                                       | P: 79.2±4.9<br>C: 77.1±7.3                                                                         | P: 56.0 %<br>C: 58.2 %                                          | NA          | NA                                                                         | NA               | P: Yes<br>C: NA                                       | NA                                                              | NA | Plasma/serum              | ELISA | DNA | 8-oxoG  |
| 70 | <b>Soeiro-de-Souza et al. 2013</b> | Brazil          | 17 | Medium | BIP      | Healthy volunteers with no current or past psychiatric disorder, no family history of mood or psychotic disorders, and no recent treatment | P: 50<br>C: 50                                                         | P: 26.8±4.5<br>C: 26.0±4.0                                                                         | P: 66.0 %<br>C: 50.0 %                                          | MADRS, YMRS | P: 20.1±9.0,<br>14.1±8.3<br>C: NA                                          | Moderate         | P: No<br>C: No                                        | NA                                                              | NA | Plasma/serum              | ELISA | DNA | 8-OHdG  |
| 71 | <b>Szebeni et al. 2017</b>         | USA             | 17 | Medium | MDD, PSY | Psychiatrically normal controls donors                                                                                                     | P <sub>1</sub> : 10<br>P <sub>2</sub> : 10<br>C: 13                    | P <sub>1</sub> : 50.5±5.0<br>P <sub>2</sub> : 39.7±5.1<br>C: 47.9±4.1                              | P <sub>1</sub> : 0 %<br>P <sub>2</sub> : 20.0 %<br>C: 15.4 %    | NA          | NA                                                                         | NA               | NA                                                    | P <sub>1</sub> : 60.0 %<br>P <sub>2</sub> : 70.0 %<br>C: 30.8 % | NA | Brain: PC                 | ELISA | DNA | 8-OHdG  |
| 72 | <b>Te Koppele et al. 1996</b>      | The Netherlands | 15 | Medium | DEM      | Controls with no history of                                                                                                                | P: 3-7<br>C: 2-8                                                       | P: 83.8±7.3<br>C: 68.2±15.3                                                                        | P: 75.0 %<br>C: 37.5 %                                          | NA          | NA                                                                         | NA               | NA                                                    | NA                                                              | NA | Brain: OC, TC, FC, ML     | Chrom | DNA | 8-OHdG  |

|    |                       |        |    |        |     |                                                                                                                      |                         |                                           |                                     |                     |                              |          |                           |                                     |                                           |                           |       |            |         |
|----|-----------------------|--------|----|--------|-----|----------------------------------------------------------------------------------------------------------------------|-------------------------|-------------------------------------------|-------------------------------------|---------------------|------------------------------|----------|---------------------------|-------------------------------------|-------------------------------------------|---------------------------|-------|------------|---------|
|    |                       |        |    |        |     | neurological or psychiatric disorders                                                                                |                         |                                           |                                     |                     |                              |          |                           |                                     |                                           |                           |       |            |         |
| 73 | Topak et al. 2018     | Turkey | 16 | Medium | PSY | Healthy volunteers with normal mental capacities, no physical neurological or psychiatric disease, and no medication | P: 30<br>P: 30<br>C: 30 | P: 39.4±7.8<br>P: 35.6±9.8<br>C: 36.7±6.8 | P: 30.0 %<br>P: 53.3 %<br>C: 56.7 % | PANSS               | NA                           | NA       | P: Yes<br>P: Yes<br>C: No | P: 53.3 %<br>P: 56.7 %<br>C: 46.7 % | P: 28.2±4.5<br>P: 27.1±4.0<br>C: 28.2±5.5 | Blood cells               | Comet | DNA        | Damage  |
| 74 | Valentina et al. 2020 | Russia | 11 | Low    | BIP | Healthy controls without chronic somatic diseases                                                                    | P: 19<br>C: 20          | P: 38.0<br>C: 34.5                        | NA                                  | NA                  | NA                           | NA       | P: Yes<br>C: NA           | NA                                  | NA                                        | Plasma/serum              | ELISA | DNA        | 8-OHdG  |
| 75 | Vieira et al. 2021    | Canada | 16 | Medium | MDD | Healthy controls with no history of major psychiatric disorders or neurocognitive impairment                         | P: 57<br>C: 35          | P: 73.2±7.7<br>C: 70.5±7.4                | P: 87.7 %<br>C: 91.4 %              | HAM-D <sub>21</sub> | P: 18.7±6.3<br>C: 1.6±2.2    | Mild     | P: Yes<br>C: NA           | NA                                  | P: 27.3<br>C: 26.8±4.6                    | Plasma/serum              | ELISA | DNA        | 8-oxodG |
| 76 | Wang et al. 2006      | USA    | 14 | Low    | DEM | Controls neuro-psychologically normal                                                                                | P: 8<br>C: 6            | P: 89.5±13.6<br>C: 81.0±9.3               | P: 50.0 %<br>C: 33.3 %              | Braak stage         | NA                           | NA       | NA                        | NA                                  | NA                                        | Brain: FC, PC, TC, CB     | Chrom | DNA, mtDNA | 8-OHdG  |
| 77 | Wei et al. 2009       | China  | 15 | Medium | MDD | Non-depression in patients with gastric adenocarcinoma stage III                                                     | P: 63<br>C: 43          | P: 54.9±14.7<br>C: 48.6±12.1              | NA                                  | SCL-90              | P: 82.4±43.1<br>C: 27.8±12.0 | NA       | NA                        | P: 0 %<br>C: 0 %                    | NA                                        | Plasma/serum              | ELISA | DNA        | 8-OHdG  |
| 78 | Wei et al. 2009       | China  | 15 | Medium | MDD | Non-depression in patients with colorectal carcinoma                                                                 | P: 52<br>C: 30          | P: 56.0±13.9<br>C: 58.5±11.3              | NA                                  | SCL-90              | P: 86.9±45.7<br>C: 22.3±15.0 | NA       | NA                        | P: 0 %<br>C: 0 %                    | NA                                        | Plasma/serum              | ELISA | DNA        | 8-OHdG  |
| 79 | Weidner et al. 2011   | USA    | 12 | Low    | DEM | Non-cognitively impaired controls                                                                                    | P: 12<br>C: 10          | P: 83.0±6.7<br>C: 90.0±5.6                | P: 83.3 %<br>C: 90.0 %              | MMSE                | P: 6.9±7.2<br>C: 28.0±1.6    | Severe   | NA                        | NA                                  | NA                                        | Brain: FC, ML, PC, TC, CB | Chrom | RNA        | 8-OHG   |
| 80 | Yi et al. 2012        | Japan  | 18 | Medium | MDD | Non-depression in male workers                                                                                       | P: 105<br>C: 196        | P: 43.4±10.3<br>C: 44.4±11.1              | P: 0 %<br>C: 0 %                    | CES-D               | NA                           | NA       | NA                        | P: 48.6 %<br>C: 43.9 %              | P: 23.1±3.5<br>C: 23.8±3.2                | Urine                     | Chrom | DNA        | 8-OHdG  |
|    |                       |        |    |        |     | Non-depression in female workers                                                                                     | P: 74<br>C: 136         | P: 41.5±10.0<br>C: 40.4±10.7              | P: 100 %<br>C: 100 %                | CES-D               | NA                           | NA       | NA                        | P: 0 %<br>C: 2.9 %                  | P: 21.1±3.2<br>C: 21.0±3.1                | Urine                     | Chrom | DNA        | 8-OHdG  |
| 81 | Young et al. 2007     | UK     | 16 | Medium | PSY | Apparently healthy controls                                                                                          | P: 16<br>C: 17          | P: 37.9±11.0<br>C: 38.9±9.2               | P: 25.0 %<br>C: 29.4 %              | PANSS               | NA                           | NA       | P: Yes<br>C: NA           | NA                                  | NA                                        | Blood cells               | Comet | DNA        | Damage  |
| 82 | Zengi et al. 2012     | Turkey | 16 | Medium | DEM | Healthy elderly volunteers with negative psychiatric anamnesis                                                       | P: 21<br>C: 20          | P: 76.0±7.8<br>C: 81.0±7.2                | P: 52.4 %<br>C: 45.0 %              | MMSE                | P: 14.2±3.2<br>C: NA         | Moderate | NA                        | P: 0 %<br>C: 0 %                    | NA                                        | Urine                     | Chrom | DNA        | 8-OHdG  |

Values are expressed as number (%) or mean±sd.

**Abbreviations.** DEM: dementia, SUB: substance misuse, PSY: psychotic disorder, BD: bipolar disorder, MDD: major depressive disorder, ANX: anxiety. P: patients, C: controls. AUDIT: Alcohol Use Disorders Identification Test, BDI: Beck Depression Inventory, CDR: Clinical Dementia Rating, CES-D: Center for Epidemiologic Studies

Depression Scale, CGI: The Clinical Global Impressions Scale, CIWA-Ar-C: Clinical Institute Withdrawal Assessment for Alcohol Revised, HAM-D: Hamilton Depression Rating Scale, IDS-SR: Inventory of Depressive Symptomatology Self-Report, MADRS: Montgomery-Asberg Depression Rating Scale, MMSE: Mini Mental State Examination, PANSS: Positive and Negative Syndrome Scale, Y-BOCS: Yale-Brown Obsessive-Compulsive Scale, YMRS: Young Mania Rating Scale, SDS: Self-Rating Depression Scale, SCL-90: Symptom Checklist-90. FC: frontal cortex, TC: temporal cortex, PC: parietal cortex, OC: occipital cortex, ML: middle lobe, CB: cerebellum. Chrom: chromatography, Comet: comet assay, ELISA: Enzyme-Linked Immunosorbent Assay, IC: immunohistochemistry. mtDNA: mitochondrial DNA. 8-OHdG, 8-oxodG, 8-oxo2dG: 8-hydroxy-2'-deoxyguanosine, 8-OHG: 8-hydroxyguanosine, 8-oxoGuo, 8-oxoG: 8-oxo-7,8-dihydroguanosine. NA: not applicable.

**eTable 3.** Characteristics of Included Intervention Studies

| ID           | Author, year                  | Country | STROBE score | Study quality | Disorder | Intervention & randomization                          | n     | Age       | Female | Severity scale      | Scale points                     | Severity                      | Drugs                | Smokers | BMI                             | Matrix        | Method | Nucleic acid | Marker              |
|--------------|-------------------------------|---------|--------------|---------------|----------|-------------------------------------------------------|-------|-----------|--------|---------------------|----------------------------------|-------------------------------|----------------------|---------|---------------------------------|---------------|--------|--------------|---------------------|
| 2            | Ahmadimanesht et al. 2019     | Iran    | 19           | High          | MDD      | Treatment with citalopram, randomized                 | 25    | 37.0±8.7  | 64.0 % | HAM-D <sub>21</sub> | Pre: 27.7±8.1<br>Post: 19.8±9.0  | Pre: Severe<br>Post: Moderate | Pre: No<br>Post: Yes | 0 %     | Pre: 26.2±4.6<br>Post: 26.1±4.7 | Blood cells   | Comet  | DNA          | Strand breaks       |
|              |                               |         |              |               |          | Plasma/serum                                          | ELISA | DNA       | 8-OHdG |                     |                                  |                               |                      |         |                                 |               |        |              |                     |
|              |                               |         |              |               |          | Treatment with sertraline, randomized                 | 20    | 34.4±9.1  | 80.0 % | HAM-D <sub>21</sub> | Pre: 26.9±11.4<br>Post: 17.4±9.2 | Pre: Severe<br>Post: Moderate | Pre: No<br>Post: Yes | 0 %     | Pre: 25.4±5.4<br>Post: 25.6±5.6 | Blood cells   | Comet  | DNA          | Strand breaks       |
| Plasma/serum | ELISA                         | DNA     | 8-OHdG       |               |          |                                                       |       |           |        |                     |                                  |                               |                      |         |                                 |               |        |              |                     |
| 13           | Chen et al. 2011              | Taiwan  | 17           | Medium        | SUB      | 1 week alcohol detoxification, not randomized         | 79    | 41.0±7.0  | 15.2 % | CIWA-Ar-C           | Pre: 10.7±5.9<br>Post: NA        | NA                            | NA                   | NA      | NA                              | Plasma/serum  | ELISA  | DNA          | 8-OHdG              |
| 28           | Hosseini-Ghalibaf et al. 2019 | Iran    | 19           | High          | BIP      | Coenzyme Q10 supplementation, randomized              | 36    | 37.5±10.7 | 77.8 % | MADRS               | NA                               | NA                            | Yes                  | 22,2 %  | NA                              | Urine, saliva | ELISA  | DNA          | 8-OHdG              |
|              |                               |         |              |               |          | Placebo, randomized                                   | 33    | 39.5±10.8 | 90.9 % | MADRS               | NA                               | NA                            | Yes                  | 21,2 %  | NA                              | Urine, saliva | ELISA  | DNA          | 8-OHdG              |
| 29           | Huang et al. 2018             | Taiwan  | 17           | Medium        | SUB      | 2 weeks of methamphetamine abstinence, not randomized | 182   | 31.1±8.3  | 21.4 % | AUDIT               | Pre: 4.0±6.0<br>Post: NA         | NA                            | NA                   | 95,2 %  | NA                              | Plasma/serum  | ELISA  | DNA          | 8-OHdG              |
| 30           | Huang et al. 2014             | Taiwan  | 17           | Medium        | SUB      | 1 week of alcohol detoxification, not randomized      | 16    | 44.4±8.4  | 0 %    | CIWA-Ar-C           | Pre: 30.4±7.2<br>Post: NA        | NA                            | NA                   | NA      | NA                              | Plasma/serum  | ELISA  | DNA          | 8-OHdG              |
|              |                               |         |              |               |          |                                                       | 58    | 40.6±5.9  | 12.1 % | CIWA-Ar-C           | Pre: 14.0±7.3<br>Post: NA        | NA                            | NA                   | NA      | NA                              | Plasma/serum  | ELISA  | DNA          | 8-OHdG              |
| 38           | Jorgensen et al. 2013         | Denmark | 20           | High          | MDD      | ECT, not randomized                                   | 29    | 46.2±17.0 | 51.7 % | HAM-D <sub>17</sub> | Pre: 26.9±4.5<br>Post: 11.7±6.8  | Pre: Severe<br>Post: Mild     | Yes                  | 44,8 %  | Pre: 24.3±4.7<br>Post: NA       | Urine         | Chrom  | RNA          | 8-oxodG<br>8-oxoGuo |
| 47           | Lindqvist et al. 2017         | USA     | 20           | High          | MDD      | 8-week SSRI-treatment, not randomized                 | 19    | NA        | NA     | HAM-D <sub>17</sub> | NA                               | NA                            | NA                   | NA      | NA                              | Plasma/serum  | Chrom  | DNA          | 8-OHdG              |

Values are expressed as number (%) or mean±sd.

**Abbreviations.** MDD: major depressive disorder, SUB: substance misuse, BIP: bipolar disorder. HAM-D: Hamilton Depression Rating Scale, CIWA-Ar-C: Clinical Institute Withdrawal Assessment for Alcohol Revised, MADRS: Montgomery-Asberg Depression Rating Scale, AUDIT: Alcohol Use Disorders Identification Test. Comet: comet assay, ELISA: Enzyme-Linked Immunosorbent Assay, Chrom: chromatography. 8-OHdG, 8-oxodG: 8-hydroxy-2'-deoxyguanosine, 8-OHG: 8-hydroxyguanosine, 8-oxoGuo: 8-oxo-7,8-dihydroguanosine. NA: not applicable.



**eFigure 2. Forest Plots and Meta-analyses of Central Nervous System Markers**

**Forest plots and meta-analyses of cortical DNA (A), cortical RNA (B), cortical mtDNA (C), hippocampal DNA (D), hippocampal RNA (E), cerebellar DNA (F), cerebellar RNA (G), and CSF DNA markers (H).** Results are standardized mean differences (Hedges g) with 95% confidence intervals. Heterogeneity is expressed by the  $I^2$  statistic. Results from the multilevel meta-analysis are given below each plot. DEM: Dementia disorders; SUB: Substance use disorders; PSY: Psychotic disorders; BIP: Bipolar disorders; MDD: Major Depressive Disorders; ANX: Anxiety disorders. The study ID refers to eTable 2, which provides study details.

**A**

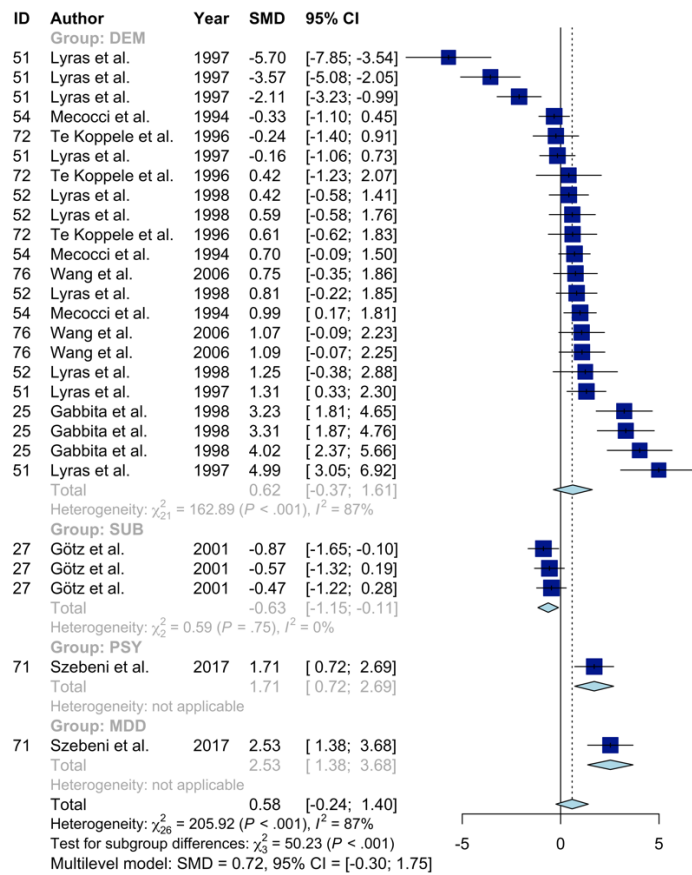

**B**

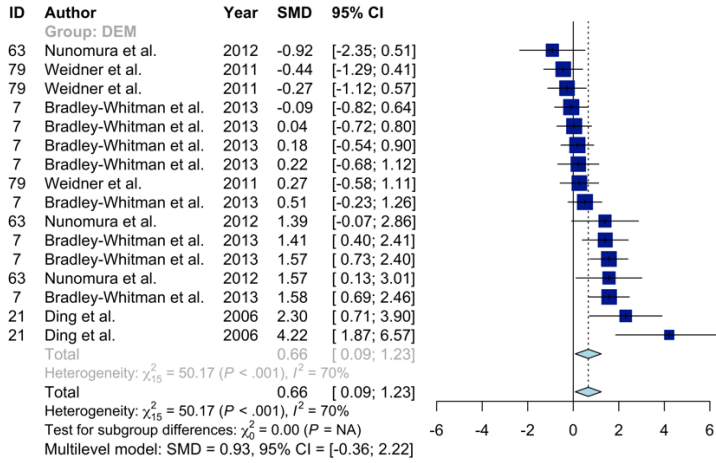

**C**

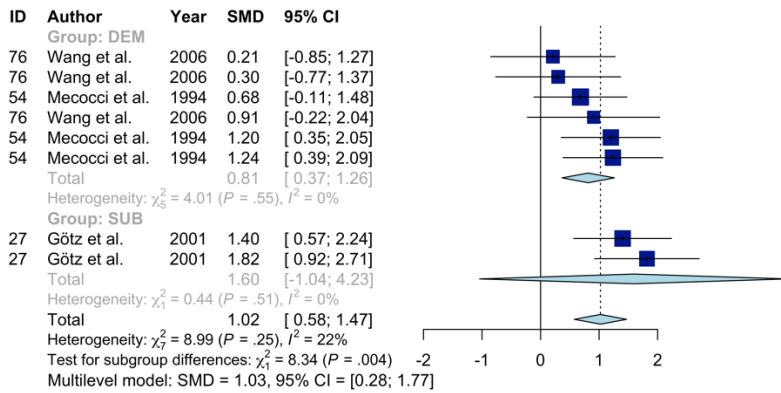

D

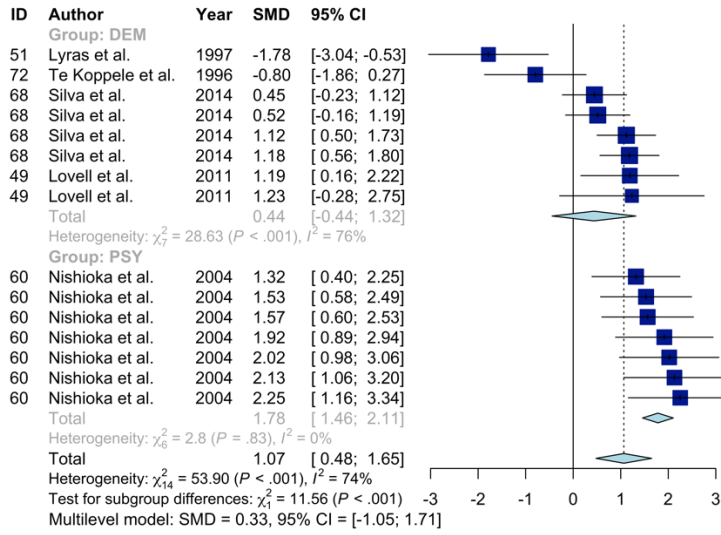

E

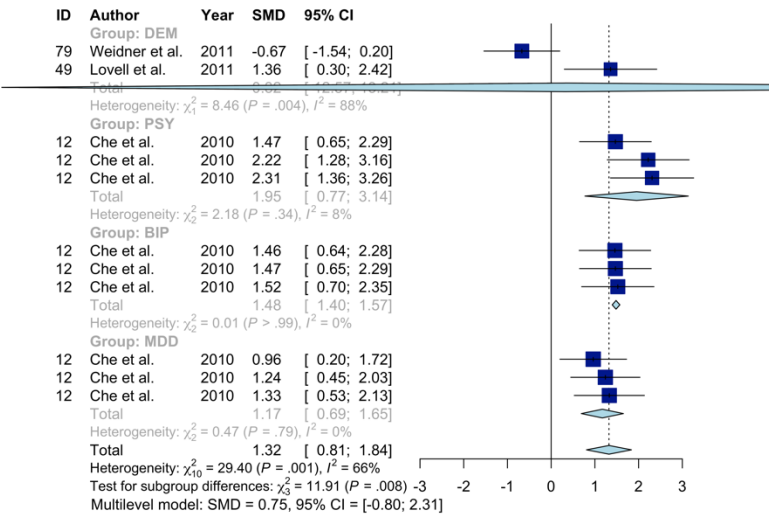

**F**

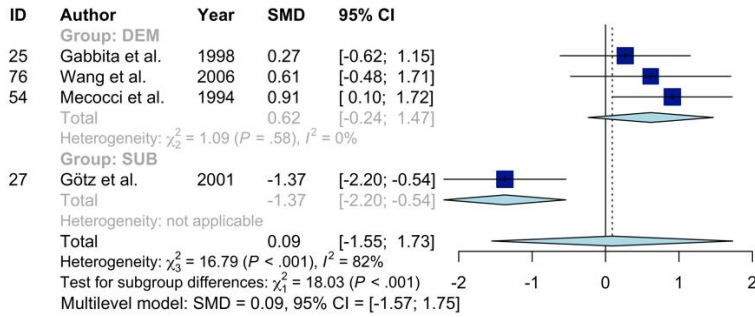

**G**

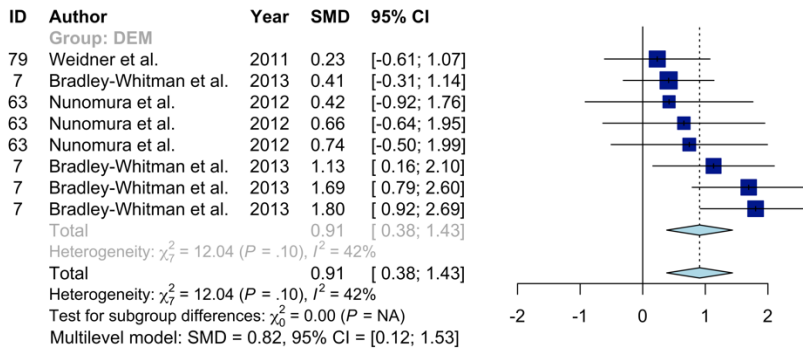

**H**

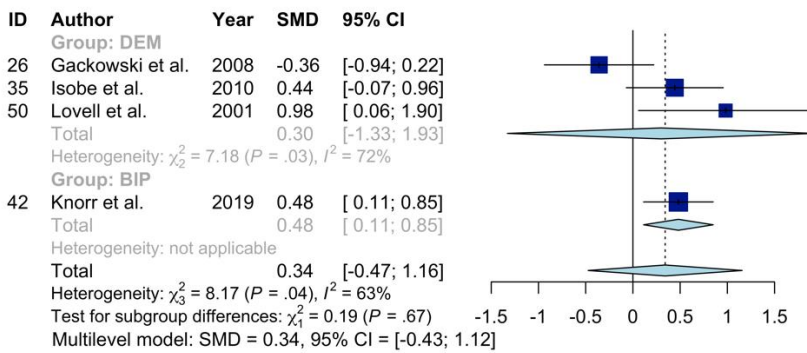

**eTable 4.** Multilevel Meta-analyses and Sensitivity Analysis for Central Nervous System Markers

| Cortex, DNA markers   |                        |                     |                       |                                            |                     |                       |
|-----------------------|------------------------|---------------------|-----------------------|--------------------------------------------|---------------------|-----------------------|
|                       | All studies (NC = 27)  |                     |                       | Medium and high-quality studies (NC = 11)  |                     |                       |
|                       | <i>g</i>               | 95% CI              | <i>I</i> <sup>2</sup> | <i>g</i>                                   | 95% CI              | <i>I</i> <sup>2</sup> |
| DEM                   | 0.76                   | [-0.44; 1.98]       |                       | -0.48                                      | [-2.74; 1.78]       |                       |
| SUB                   | -0.64                  | [-3.65; 2.38]       |                       | NA                                         | NA                  |                       |
| PSY                   | 1.71                   | [-2.52; 5.93]       |                       | 1.71                                       | [-4.98; 8.39]       |                       |
| BIP                   | NA                     | NA                  |                       | NA                                         | NA                  |                       |
| MDD                   | 2.53                   | [-1.74; 6.79]       |                       | 2.526                                      | [-4.19; 9.24]       |                       |
| ANX                   | NA                     | NA                  |                       | NA                                         | NA                  |                       |
| <b>Total</b>          | 0.72                   | [-0.30; 1.75]       | 93%                   | 0.004                                      | [-1.89; 1.90]       | 95%                   |
| Cortex, RNA markers   |                        |                     |                       |                                            |                     |                       |
|                       | All studies (NC = 16)  |                     |                       | Medium and high-quality studies (NC = 8)   |                     |                       |
|                       | <i>g</i>               | 95% CI              | <i>I</i> <sup>2</sup> | <i>g</i>                                   | 95% CI              | <i>I</i> <sup>2</sup> |
| DEM                   | 0.93                   | [-0.36; 2.22]       |                       | <b>0.64</b>                                | <b>[0.05; 1.23]</b> |                       |
| SUB                   | NA                     | NA                  |                       | NA                                         | NA                  |                       |
| PSY                   | NA                     | NA                  |                       | NA                                         | NA                  |                       |
| BIP                   | NA                     | NA                  |                       | NA                                         | NA                  |                       |
| MDD                   | NA                     | NA                  |                       | NA                                         | NA                  |                       |
| ANX                   | NA                     | NA                  |                       | NA                                         | NA                  |                       |
| <b>Total</b>          | 0.93                   | [-0.36; 2.22]       | 87%                   | <b>0.64</b>                                | <b>[0.05; 1.23]</b> | 66%                   |
| Cortex, mtDNA markers |                        |                     |                       |                                            |                     |                       |
|                       | All studies (NC = 8) * |                     |                       | Medium and high-quality studies (NC = 8) * |                     |                       |
|                       | <i>g</i>               | 95% CI              | <i>I</i> <sup>2</sup> | <i>g</i>                                   | 95% CI              | <i>I</i> <sup>2</sup> |
| DEM                   | <b>0.78</b>            | <b>[0.09; 1.47]</b> |                       | <b>0.78</b>                                | <b>[0.09; 1.47]</b> |                       |
| SUB                   | <b>1.60</b>            | <b>[0.57; 2.62]</b> |                       | <b>1.60</b>                                | <b>[0.57; 2.62]</b> |                       |
| PSY                   | NA                     | NA                  |                       | NA                                         | NA                  |                       |
| BIP                   | NA                     | NA                  |                       | NA                                         | NA                  |                       |
| MDD                   | NA                     | NA                  |                       | NA                                         | NA                  |                       |
| ANX                   | NA                     | NA                  |                       | NA                                         | NA                  |                       |
| <b>Total</b>          | <b>1.03</b>            | <b>[0.29; 1.77]</b> |                       | <b>1.03</b>                                | <b>[0.29; 1.77]</b> | 49%                   |

| Hippocampus, DNA markers |                       |               |          |                                           |               |          |
|--------------------------|-----------------------|---------------|----------|-------------------------------------------|---------------|----------|
|                          | All studies (NC = 15) |               |          | Medium and high-quality studies (NC = 11) |               |          |
|                          | <i>g</i>              | 95% CI        | <i>P</i> | <i>g</i>                                  | 95% CI        | <i>P</i> |
| DEM                      | -0.06                 | [-1.54; 1.43] |          | -0.41                                     | [-2.42; 1.59] |          |
| SUB                      | NA                    | NA            |          | NA                                        | NA            |          |
| PSY                      | 1.79                  | [-1.04; 4.61] |          | 1.79                                      | [-1.51; 5.08] |          |
| BIP                      | NA                    | NA            |          | NA                                        | NA            |          |
| MDD                      | NA                    | NA            |          | NA                                        | NA            |          |
| ANX                      | NA                    | NA            |          | NA                                        | NA            |          |
| <b>Total</b>             | 0.33                  | [-1.05; 1.71] | 90%      | 0.17                                      | [-1.69; 2.03] | 90%      |

  

| Hippocampus, RNA markers |                         |               |          |                                             |                     |          |
|--------------------------|-------------------------|---------------|----------|---------------------------------------------|---------------------|----------|
|                          | All studies (NC = 11) * |               |          | Medium and high-quality studies (NC = 10) * |                     |          |
|                          | <i>g</i>                | 95% CI        | <i>P</i> | <i>g</i>                                    | 95% CI              | <i>P</i> |
| DEM                      | 0.32                    | [-2.08; 2.72] |          | <b>1.36</b>                                 | <b>[0.06; 2.66]</b> |          |
| SUB                      | NA                      | NA            |          | NA                                          | NA                  |          |
| PSY                      | 1.95                    | [-1.30; 5.20] |          | <b>1.95</b>                                 | <b>[1.31; 2.59]</b> |          |
| BIP                      | 1.48                    | [-1.76; 4.72] |          | <b>1.48</b>                                 | <b>[0.89; 2.07]</b> |          |
| MDD                      | 1.17                    | [-2.06; 4.41] |          | <b>1.17</b>                                 | <b>[0.60; 1.74]</b> |          |
| ANX                      | NA                      | NA            |          | NA                                          | NA                  |          |
| <b>Total</b>             | 0.75                    | [-0.80; 2.31] | 88%      | <b>1.49</b>                                 | <b>[1.19; 1.80]</b> | 0%       |

| Cerebellum, DNA markers |                      |               |          |                                          |               |          |
|-------------------------|----------------------|---------------|----------|------------------------------------------|---------------|----------|
|                         | All studies (NC = 4) |               |          | Medium and high-quality studies (NC = 4) |               |          |
|                         | <i>g</i>             | 95% CI        | <i>P</i> | <i>g</i>                                 | 95% CI        | <i>P</i> |
| DEM                     | 0.61                 | [-0.53; 1.77] |          | 0.61                                     | [-0.53; 1.77] |          |
| SUB                     | -1.37                | [-3.18; 0.44] |          | -1.37                                    | [-3.18; 0.44] |          |
| PSY                     | NA                   | NA            |          | NA                                       | NA            |          |
| BIP                     | NA                   | NA            |          | NA                                       | NA            |          |
| MDD                     | NA                   | NA            |          | NA                                       | NA            |          |
| ANX                     | NA                   | NA            |          | NA                                       | NA            |          |
| <b>Total</b>            | 0.09                 | [-1.57; 1.75] | 81%      | 0.09                                     | [-1.57; 1.75] | 81%      |

  

| Cerebellum, RNA markers |                      |                     |          |                                          |                     |          |
|-------------------------|----------------------|---------------------|----------|------------------------------------------|---------------------|----------|
|                         | All studies (NC = 8) |                     |          | Medium and high-quality studies (NC = 4) |                     |          |
|                         | <i>g</i>             | 95% CI              | <i>P</i> | <i>g</i>                                 | 95% CI              | <i>P</i> |
| DEM                     | <b>0.82</b>          | <b>[0.13; 1.53]</b> |          | <b>1.23</b>                              | <b>[0.15; 2.32]</b> |          |
| SUB                     | NA                   | NA                  |          | NA                                       | NA                  |          |
| PSY                     | NA                   | NA                  |          | NA                                       | NA                  |          |
| BIP                     | NA                   | NA                  |          | NA                                       | NA                  |          |
| MDD                     | NA                   | NA                  |          | NA                                       | NA                  |          |
| ANX                     | NA                   | NA                  |          | NA                                       | NA                  |          |
| <b>Total</b>            | <b>0.82</b>          | <b>[0.13; 1.53]</b> | 50%      | <b>1.23</b>                              | <b>[0.15; 2.32]</b> | 59%      |

| CSF, DNA markers |                      |               |                       |                                          |               |                       |
|------------------|----------------------|---------------|-----------------------|------------------------------------------|---------------|-----------------------|
|                  | All studies (NC = 4) |               |                       | Medium and high-quality studies (NC = 4) |               |                       |
|                  | <i>g</i>             | 95% CI        | <i>I</i> <sup>2</sup> | <i>g</i>                                 | 95% CI        | <i>I</i> <sup>2</sup> |
| DEM              | 0.30                 | [-1.30; 1.90] |                       | 0.30                                     | [-1.30; 1.90] |                       |
| SUB              | NA                   | NA            |                       | NA                                       | NA            |                       |
| PSY              | NA                   | NA            |                       | NA                                       | NA            |                       |
| BIP              | 0.48                 | [-2.01; 2.97] |                       | 0.48                                     | [-2.01; 2.97] |                       |
| MDD              | NA                   | NA            |                       | NA                                       | NA            |                       |
| ANX              | NA                   | NA            |                       | NA                                       | NA            |                       |
| <b>Total</b>     | 0.34                 | [-0.43; 1.12] | 66%                   | 0.34                                     | [-0.43; 1.12] | 66%                   |

Multilevel meta-analysis of central nervous system markers of oxidation of nucleic acids in psychiatric disorders, including subgroup analyses and sensitivity analyses excluding low quality studies. Data are standardized mean differences expressed as Hedges' *g* with 95% confidence intervals and heterogeneity expressed by *I*<sup>2</sup>. \* Test of subgroup differences significant (*p* < 0.05). Bold type: *p* < 0.05. NC: Number of patient- vs. control-group comparisons.

## eTable 5. Meta-regression Analyses of Covariates

### Age and gender:

#### Model Results:

|        | estimate | 95% CI         | p       |
|--------|----------|----------------|---------|
| age    | 0.018    | [0.01; 0.02]   | <0.0001 |
| gender | -0.004   | [-0.01; 0.002] | 0.26    |

Test of Moderators (coefficients 1:2): F(df1 = 2, df2 = 179) = 28.7579, p-val < .0001.

#### Full (including covariate(s)) vs. reduced (uncorrected) model:

|         | df | AIC    | BIC    | LRT  | p    |
|---------|----|--------|--------|------|------|
| Full    | 4  | 501.31 | 514.11 |      |      |
| Reduced | 3  | 499.12 | 508.71 | 0.00 | 1.00 |

### Smoking:

#### Model Results:

|         | estimate | 95% CI         | p    |
|---------|----------|----------------|------|
| smoking | -0.003   | [-0.01; 0.005] | 0.43 |

#### Full (including covariate(s)) vs. reduced (uncorrected) model:

|         | df | AIC    | BIC    | LRT  | p    |
|---------|----|--------|--------|------|------|
| Full    | 4  | 133.67 | 142.24 |      |      |
| Reduced | 3  | 132.22 | 138.65 | 0.55 | 0.47 |

### BMI:

#### Model Results:

|     | estimate | 95% CI        | p   |
|-----|----------|---------------|-----|
| BMI | -0.003   | [-0.11; 0.05] | 0.4 |

#### Full (including covariate(s)) vs. reduced (uncorrected) model:

|         | df | AIC   | BIC   | LRT  | p    |
|---------|----|-------|-------|------|------|
| Full    | 4  | 80.21 | 87.35 |      |      |
| Reduced | 3  | 78.69 | 84.04 | 0.48 | 0.49 |



## eTable 6. Meta-analyses of Secondary Outcomes

### Measurement methodology:

Model Results:

| Method         | estimate | 95% CI       | p     |
|----------------|----------|--------------|-------|
| Comet          | 1.31     | [0.80; 1.81] | <.001 |
| IHC            | 1.15     | [0.50; 1.81] | <.001 |
| Other          | 1.06     | [0.35; 1.77] | 0.004 |
| ELISA          | 1.00     | [0.64; 1.36] | <.001 |
| Chromatography | 0.52     | [0.23; 0.80] | <.001 |

Test of Moderators:  $F(df1 = 5, df2 = 200) = 17.3933, p < .0001$

### Study quality:

Model Results:

| Level  | estimate | 95% CI       | p     |
|--------|----------|--------------|-------|
| Low    | 1.03     | [0.70; 1.36] | <.001 |
| Medium | 0.90     | [0.56; 1.24] | <.001 |
| High   | 0.60     | [0.25; 0.95] | <.001 |

Test of Moderators:  $F(df1 = 3, df2 = 202) = 24.8624, p < .0001$

### Illness severity:

Model Results:

| Level    | estimate | 95% CI       | p     |
|----------|----------|--------------|-------|
| Mild     | 1.06     | [0.58; 1.54] | <.001 |
| Moderate | 0.87     | [0.46; 1.30] | <.001 |
| Severe   | 1.27     | [0.69; 1.87] | <.001 |

Test of Moderators:  $F(df1 = 3, df2 = 55) = 10.9718, p < .0001$

### Pharmacological treatment:

Model Results:

|     | estimate | 95% CI       | p     |
|-----|----------|--------------|-------|
| No  | 0.70     | [0.24; 1.16] | <.01  |
| Yes | 1.03     | [0.46; 1.30] | <.001 |

Test of Moderators:  $F(df1 = 2, df2 = 99) = 17.9680, p < .0001$

### BMI controlled studies only:

Model Results:

| Group | estimate | 95% CI       | p     |
|-------|----------|--------------|-------|
| PSY   | 0.84     | [0.31; 1.36] | 0.002 |
| BIP   | 0.60     | [0.01; 1.18] | .04   |
| MDD   | 0.67     | [0.21; 1.13] | 0.005 |

Test of Moderators:  $F(df1 = 3, df2 = 41) = 5.0279, p = 0.0046$

### Cortical subregions, DNA markers:

Model Results:

| Region           | estimate | 95% CI        | p    |
|------------------|----------|---------------|------|
| Frontal cortex   | 0.20     | [-1.28; 1.69] | 0.28 |
| Occipital cortex | 1.20     | [-3.52; 1.12] | 0.29 |
| Parietal cortex  | 1.65     | [0.22; 3.08]  | 0.03 |
| Temporal cortex  | 0.76     | [-0.63; 2.13] | 0.27 |

Test of Moderators:  $F(df1 = 4, df2 = 23) = 2.0713, p = 0.12$

Cortical subregions, RNA markers:

Model Results:

| Region          | estimate | 95% CI        | p    |
|-----------------|----------|---------------|------|
| Frontal cortex  | 0.45     | [-1.69; 2.61] | 0.65 |
| Parietal cortex | 0.64     | [-0.95; 2.22] | 0.40 |
| Temporal cortex | 1.35     | [-0.22; 2.94] | 0.09 |

Test of Moderators:  $F(df1 = 3, df2 = 13) = 1.9045, p = 0.1787$

Diagnostic group across all matrices:

Model Results:

| Group | estimate | 95% CI        | p     |
|-------|----------|---------------|-------|
| DEM   | 1.02     | [0.68; 1.35]  | <.001 |
| PSY   | 0.93     | [0.54; 1.31]  | <.001 |
| BIP   | 0.86     | [0.42; 1.30]  | <.001 |
| MDD   | 0.64     | [0.24; 1.03]  | 0.002 |
| SUB   | 0.48     | [-0.36; 1.32] | 0.26  |
| ANX   | 0.37     | [-1.00; 1.73] | 0.60  |

Test of Moderators:  $F(df1 = 6, df2 = 199) = 12.2017, p < .0001$

eFigure 3. Funnel Plot of All Included Cross-sectional Studies

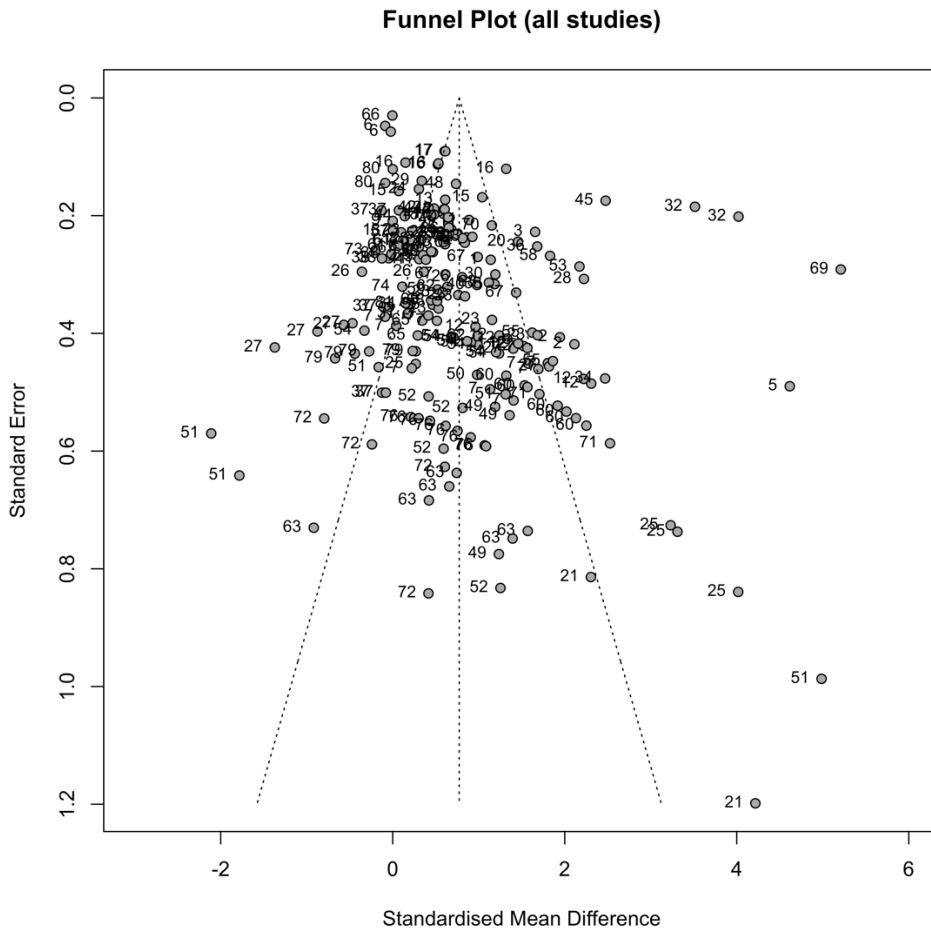

Supplement: jamapsychiatry-e222066-s001.pdf [file jamapsychiatry-e222066-s001.pdf]
